# Supplementary material
Source: publisher site journal article supplement (https://cdn.jamanetwork.com/ama/content_public/journal/derm/938229/doi190030supp1_prod.pdf)
Supplement: Supplementary file 1 [file doi190030supp1_prod.pdf]

## Supplementary Online Content

Dommasch ED, Kim SC, Lee MP, Gagne JJ. Risk of serious infection in patients receiving systemic medications for the treatment of psoriasis. *JAMA Dermatol*. Published online May 10, 2019. doi:10.1001/jamadermatol.2019.1121

**eTable 1.** ICD-CM-9 Codes for Serious Infection and Associated Positive Predictive Values (PPV)

**eTable 2.** Patient Flow Chart for Optum Clinformatics Data Mart

**eTable 3.** Patient Flow Chart for Truven MarketScan

**eTable 4.** Censoring Reasons for Medication Cohorts for Optum Clinformatics Data Mart and Truven MarketScan for Systemic Medications Compared With Methotrexate

**eTable 5.** Matched Cohorts for Systemic Medications Compared With Methotrexate in Optum Clinformatics Data Mart and Truven MarketScan

**eTable 6.** Overall and Subtypes of Serious Infections in Patient With Psoriasis on Systemic Medications Compared With methotrexate in Optum Clinformatics Data Mart

**eTable 7.** Overall and Subtypes of Serious Infections in Patients With Psoriasis on Systemic Medications Compared With Methotrexate in Truven MarketScan

**eTable 8.** Overall Serious Infections in Patients With Psoriasis and Psoriatic Arthritis on Systemic Medications Compared With Methotrexate in Optum© Clinformatics® Data Mart

**eTable 9.** Overall Risk of Serious Infection Compared With Methotrexate in Patients With Psoriasis by Age and Gender in Optum Clinformatics Data Mart

**eTable 10.** Censoring Reasons For Medication Cohorts For Optum Clinformatics Data Mart and Truven MarketScan for Systemic Medications Compared With Adalimumab

**eTable 11.** Meta-analysis of Pooled Hazard Risk of Serious Infection in Patients With Psoriasis on Systemic Medications Compared With Adalimumab

This supplementary material has been provided by the authors to give readers additional information about their work.

eTable 1. ICD-CM-9 codes for serious infection and associated positive predictive values (PPV)<sup>a</sup>

| Serious Infection Type                                                                                                | Primary Discharge ICD-CM-9 Codes <sup>b</sup>                                                                                                                                           | PPV (%) |
|-----------------------------------------------------------------------------------------------------------------------|-----------------------------------------------------------------------------------------------------------------------------------------------------------------------------------------|---------|
| Pneumonia-primary definition                                                                                          | 003.22, 480.x*, 481, 482.x, 483.x, 484.x, 485.x, 486.x, 487.0                                                                                                                           | 96.5    |
| Pneumonia-secondary definition (primary diagnosis code with pneumonia diagnosis (above) in any other diagnosis field) | 510.x, 038.x, 790.7, 995.91, 995.92                                                                                                                                                     |         |
| Meningitis/encephalitis                                                                                               | 003.21, 036.0, 047.x, 049.x, 053.0, 054.72, 072.1, 091.81, 094.2, 098.82, 100.81, 320.x, 036.1, 054.3, 056.01, 058.21, 058.29, 062.x, 063.x, 064.x, 066.41, 072.2, 094.81, 130.0, 323.x | 50.0    |
| Bacteremia/Sepsis <sup>c</sup>                                                                                        | 038.x, 790.7, 995.91, 995.92                                                                                                                                                            | 82.6    |
| Cellulitis/Soft-Tissue Infections                                                                                     | 035, 040.0, 569.61, 681.x, 682.x, 728.86, 785.4                                                                                                                                         | 91.1    |
| Endocarditis                                                                                                          | 036.42, 074.22, 093.2x, 098.84, 421.x, 422.92                                                                                                                                           | 75.0    |
| Pyelonephritis                                                                                                        | 590.x                                                                                                                                                                                   | 87.6    |
| Septic Arthritis/Osteomyelitis                                                                                        | 003.23, 056.71, 098.5x, 711.0, 711.00–711.07, 711.09, 711.9x, 003.24, 376.03, 526.4, 730.0x, 730.1x, 730.2x                                                                             | 75.9    |

<sup>a</sup> Table adapted from: Wiese, A. D., Griffin, M. R., Stein, C. M., Schaffner, W., Greevy, R. A., Mitchel, E. F., Jr., & Grijalva, C. G. (2018). Validation of discharge diagnosis codes to identify serious infections among middle age and older adults. *BMJ Open*, 8(6), e020857.

<sup>b</sup> x indicates numeric values 0-9

<sup>c</sup> Without a diagnosis of pneumonia in any other field

eTable 2. Patient flow chart for Optum© Clinformatics® Data Mart

| Psoriasis Parent Cohort                       |                                     |                    |                          |          |                          |         |                          |         |                          |          |                           |         |          |        |  |          |        |
|-----------------------------------------------|-------------------------------------|--------------------|--------------------------|----------|--------------------------|---------|--------------------------|---------|--------------------------|----------|---------------------------|---------|----------|--------|--|----------|--------|
|                                               | Less Excluded Patients              | Remaining Patients |                          |          |                          |         |                          |         |                          |          |                           |         |          |        |  |          |        |
| All patients                                  |                                     | 68,328,408         |                          |          |                          |         |                          |         |                          |          |                           |         |          |        |  |          |        |
| Did not meet cohort entry criteria            | -68,151,390                         | 177,018            |                          |          |                          |         |                          |         |                          |          |                           |         |          |        |  |          |        |
| Excluded due to insufficient enrollment       | -8,473                              | 168,545            |                          |          |                          |         |                          |         |                          |          |                           |         |          |        |  |          |        |
| Excluded based on Age                         | -4,772                              | 163,773            |                          |          |                          |         |                          |         |                          |          |                           |         |          |        |  |          |        |
| Excluded based on use of other systemic meds  | -17,680                             | 146,093            |                          |          |                          |         |                          |         |                          |          |                           |         |          |        |  |          |        |
| Excluded based on other autoimmune conditions | -8,150                              | 137,943            |                          |          |                          |         |                          |         |                          |          |                           |         |          |        |  |          |        |
| Excluded based on history of malignancy       | -2,712                              | 135,231            |                          |          |                          |         |                          |         |                          |          |                           |         |          |        |  |          |        |
| Excluded based on history serious infections  | -386                                | 134,845            |                          |          |                          |         |                          |         |                          |          |                           |         |          |        |  |          |        |
| Psoriasis Cohort                              |                                     | 134,845            |                          |          |                          |         |                          |         |                          |          |                           |         |          |        |  |          |        |
|                                               |                                     |                    |                          |          |                          |         |                          |         |                          |          |                           |         |          |        |  |          |        |
|                                               | <b>Acitretin vs MTX<sup>a</sup></b> |                    | <b>Adalimumab vs MTX</b> |          | <b>Apremilast vs MTX</b> |         | <b>Etanercept vs MTX</b> |         | <b>Infliximab vs MTX</b> |          | <b>Ustekinumab vs MTX</b> |         |          |        |  |          |        |
| Psoriasis Cohort                              |                                     | 134,845            |                          | 134,845  |                          | 134,845 |                          | 134,845 |                          | 134,845  |                           | 134,845 |          |        |  |          |        |
| Not exposed to medication                     | -117,763                            | 17,082             |                          | -112,226 | 22,619                   |         | -119,542                 | 15,303  |                          | -109,578 | 25,267                    |         | -120,823 | 14,022 |  | -116,286 | 18,559 |
| Excluded due to insufficient enrollment       | -201                                | 16,881             |                          | -295     | 22,324                   |         | -200                     | 15,103  |                          | -286     | 24,981                    |         | -167     | 13,855 |  | -259     | 18,300 |
| Excluded due to prior use of referent         | -3,983                              | 12,898             |                          | -3,716   | 18,608                   |         | -3,930                   | 11,173  |                          | -3,778   | 21,203                    |         | -3,971   | 9,884  |  | -3,822   | 14,478 |
| Excluded due to prior use of exposure         | -1,117                              | 11,781             |                          | -2,927   | 15,681                   |         | -160                     | 11,013  |                          | -5,611   | 15,592                    |         | -93      | 9,791  |  | -1,214   | 13,264 |

|                                                            |    |        |  |    |        |  |   |        |  |    |        |  |   |       |  |   |        |
|------------------------------------------------------------|----|--------|--|----|--------|--|---|--------|--|----|--------|--|---|-------|--|---|--------|
| Excluded because patient qualified in >1 exposure category | -1 | 11,780 |  | -1 | 15,680 |  | 0 | 11,013 |  | -1 | 15,591 |  | 0 | 9,791 |  | 0 | 13,264 |
| Final cohort                                               |    | 11,780 |  |    | 15,680 |  |   | 11,013 |  |    | 15,591 |  |   | 9,791 |  |   | 13,264 |

---

<sup>a</sup> MTX,

methotrexate

eTable 3. Patient flow chart for Truven MarketScan

|                                                            | Psoriasis Parent Cohort             |                    |                          |         |                          |         |                          |         |                          |         |                           |         |
|------------------------------------------------------------|-------------------------------------|--------------------|--------------------------|---------|--------------------------|---------|--------------------------|---------|--------------------------|---------|---------------------------|---------|
|                                                            | Less Excluded Patients              | Remaining Patients |                          |         |                          |         |                          |         |                          |         |                           |         |
| All patients                                               |                                     | 185,306,593        |                          |         |                          |         |                          |         |                          |         |                           |         |
| Did not meet cohort entry criteria                         | -184,835,058                        | 471,535            |                          |         |                          |         |                          |         |                          |         |                           |         |
| Excluded due to insufficient enrollment                    | -23,390                             | 448,145            |                          |         |                          |         |                          |         |                          |         |                           |         |
| Excluded based on Age                                      | -13,910                             | 434,235            |                          |         |                          |         |                          |         |                          |         |                           |         |
| Excluded based on use of other systemic meds               | -22,058                             | 412,177            |                          |         |                          |         |                          |         |                          |         |                           |         |
| Excluded based on other autoimmune conditions              | -26,749                             | 385,428            |                          |         |                          |         |                          |         |                          |         |                           |         |
| Excluded based on history of malignancy                    | -7,181                              | 378,247            |                          |         |                          |         |                          |         |                          |         |                           |         |
| Excluded based on history serious infections               | -510                                | 377,737            |                          |         |                          |         |                          |         |                          |         |                           |         |
| Psoriasis Cohort                                           |                                     | 377,737            |                          |         |                          |         |                          |         |                          |         |                           |         |
|                                                            | <b>Acitretin vs MTX<sup>a</sup></b> |                    | <b>Adalimumab vs MTX</b> |         | <b>Apremilast vs MTX</b> |         | <b>Etanercept vs MTX</b> |         | <b>Infliximab vs MTX</b> |         | <b>Ustekinumab vs MTX</b> |         |
| Psoriasis Cohort                                           |                                     | 377,737            |                          | 377,737 |                          | 377,737 |                          | 377,737 |                          | 377,737 |                           | 377,737 |
| Not exposed to medication                                  | -335,350                            | 42,387             | -321,499                 | 56,238  | -340,071                 | 37,666  | -319,189                 | 58,548  | -343,762                 | 33,975  | -335,195                  | 42,542  |
| Excluded due to insufficient enrollment                    | -631                                | 41,756             | -950                     | 55,288  | -553                     | 37,113  | -1,061                   | 57,487  | -518                     | 33,457  | -642                      | 41,900  |
| Excluded due to prior use of referent                      | -9,498                              | 32,258             | -8,611                   | 46,677  | -9,279                   | 27,834  | -8,797                   | 48,690  | -9,519                   | 23,938  | -9,114                    | 32,786  |
| Excluded due to prior use of exposure                      | -2,819                              | 29,439             | -8,092                   | 38,585  | -327                     | 27,507  | -10,961                  | 37,729  | -230                     | 23,708  | -2,339                    | 30,447  |
| Excluded because patient qualified in >1 exposure category | -2                                  | 29,437             | -2                       | 38,583  | 0                        | 27,507  | -2                       | 37,727  | 0                        | 23,708  | -1                        | 30,446  |

|              |  |        |  |        |  |        |  |        |  |        |  |        |
|--------------|--|--------|--|--------|--|--------|--|--------|--|--------|--|--------|
| Final cohort |  | 29,437 |  | 38,583 |  | 27,507 |  | 37,727 |  | 23,708 |  | 30,446 |
|--------------|--|--------|--|--------|--|--------|--|--------|--|--------|--|--------|

---

<sup>a</sup> MTX, methotrexate

eTable 4. Censoring reasons for medication cohorts for Optum© Clinformatics® Data Mart and Truven MarketScan for systemic medications compared to methotrexate

|                                             | <b>Reference group:<br/>Methotrexate Users<br/>(compared to adalimumab)</b> | <b>Adalimumab users</b> | <b>Acitretin users</b> | <b>Apremilast users</b> | <b>Etanercept users</b> | <b>Infliximab Users</b> | <b>Ustekinumab Users</b> |
|---------------------------------------------|-----------------------------------------------------------------------------|-------------------------|------------------------|-------------------------|-------------------------|-------------------------|--------------------------|
| <b>Optum© Clinformatics® Data Mart</b>      |                                                                             |                         |                        |                         |                         |                         |                          |
| No. of patients                             | 8,470                                                                       | 7,181                   | 2,726                  | 1,623                   | 7,102                   | 408                     | 4,085                    |
| Median Follow-Up Time (Days) [IQR]          | 215 [146, 399]                                                              | 257 [146, 463]          | 188 [148, 312]         | 169 [98, 275]           | 287 [173, 537]          | 217 [119, 377]          | 251 [146, 437]           |
| <b>Censoring Reasons</b>                    |                                                                             |                         |                        |                         |                         |                         |                          |
| Outcome                                     | 112 (1.3%)                                                                  | 79 (1.1%)               | 30 (1.1%)              | 4 (0.2%)                | 68 (1.0%)               | 6 (1.5%)                | 21 (0.5%)                |
| Start of an additional exposure (crossover) | 695 (8.2%)                                                                  | 366 (5.1%)              | 137 (5.0%)             | 39 (2.4%)               | 289 (4.1%)              | 43 (10.5%)              | 121 (3.0%)               |
| End of index exposure                       | 4,300 (50.8%)                                                               | 3,004 (41.8%)           | 1,792 (65.7%)          | 538 (33.1%)             | 3,694 (52.0%)           | 199 (48.8%)             | 1,542 (37.7%)            |
| Specified date reached (10/01/2015)         | 918 (10.8%)                                                                 | 1,044 (14.5%)           | 138 (5.1%)             | 502 (30.9%)             | 388 (5.5%)              | 44 (10.8%)              | 796 (19.5%)              |
| Death/Disenrollment                         | 2445 (28.9%)                                                                | 2688 (37.4%)            | 629 (23.1%)            | 540 (33.3%)             | 2663 (37.5%)            | 116 (28.4%)             | 1605 (39.3%)             |
| <b>Truven MarketScan</b>                    |                                                                             |                         |                        |                         |                         |                         |                          |
| No. of patients                             | 20,609                                                                      | 17,912                  | 7,456                  | 4,476                   | 16,791                  | 1,027                   | 7,841                    |
| Median Follow-Up Time (Days) [IQR]          | 209 [146, 391]                                                              | 278 [153, 503]          | 202 [148, 328]         | 148 [73, 239]           | 313 [188, 587]          | 273 [147, 481]          | 262 [146, 458]           |
| <b>Censoring Reasons</b>                    |                                                                             |                         |                        |                         |                         |                         |                          |
| Outcome                                     | 426 (1.1%)                                                                  | 229 (1.1%)              | 81 (1.1%)              | 11 (0.2%)               | 168 (1.0%)              | 20 (1.9%)               | 56 (0.7%)                |
| Start of an additional exposure (crossover) | 3,286 (8.5%)                                                                | 2,249 (10.9%)           | 418 (5.6%)             | 85 (1.9%)               | 672 (4.0%)              | 265 (25.8%)             | 244 (3.1%)               |
| End of index exposure                       | 17,282 (44.9%)                                                              | 10,156 (49.3%)          | 4,946 (66.3%)          | 889 (19.9%)             | 8,682 (51.7%)           | 579 (56.4%)             | 2,755 (35.1%)            |
| Specified date reached (10/01/2015)         | 4,810 (12.5%)                                                               | 2,021 (9.8%)            | 369 (4.9%)             | 1,588 (35.5%)           | 1,420 (8.5%)            | 63 (6.1%)               | 1,774 (22.6%)            |
| Death/Disenrollment                         | 5954 (28.9%)                                                                | 6763 (37.8%)            | 1642 (22.0%)           | 1903 (42.5%)            | 5849 (34.9%)            | 100 (9.74%)             | 3012 (38.4%)             |

eTable 5. Matched cohorts for systemic medications compared to methotrexate in Optum© Clinformatics® Data Mart and Truven MarketScan

| Variable                                       | Optum CDM          |                   |                          | Truven Marketscan  |                   |             |
|------------------------------------------------|--------------------|-------------------|--------------------------|--------------------|-------------------|-------------|
|                                                | Methotrexate Users | Acitretin users   | Abs Std Dif <sup>a</sup> | Methotrexate Users | Acitretin users   | Abs Std Dif |
| Number of patients                             | 2,722              | 2,722             |                          | 7,454              | 7,454             |             |
| Overweight/obesity; n (%)                      | 114 (4.2%)         | 137 (5.0%)        | 0.04                     | 242 (3.2%)         | 256 (3.4%)        | 0.01        |
| Gender                                         |                    |                   |                          |                    |                   |             |
| ...M = MALE; n (%)                             | 1,601 (58.8%)      | 1,578 (58.0%)     | 0.017                    | 4,286 (57.5%)      | 4,220 (56.6%)     | 0.018       |
| ...F = FEMALE; n (%)                           | 1,121 (41.2%)      | 1,144 (42.0%)     |                          | 3,168 (42.5%)      | 3,234 (43.4%)     |             |
| Smoking; n (%)                                 | 135 (5.0%)         | 148 (5.4%)        | 0.022                    | 252 (3.4%)         | 284 (3.8%)        | 0.023       |
| CCI Combined Comorbidity Score (180 days)      |                    |                   |                          |                    |                   |             |
| ...mean (sd)                                   | 0.14 (1.03)        | 0.13 (1.06)       | 0.003                    | 0.07 (0.83)        | 0.08 (0.91)       | 0.012       |
| ...median [IQR] <sup>b</sup>                   | 0.00 [0.00, 0.00]  | 0.00 [0.00, 0.00] |                          | 0.00 [0.00, 0.00]  | 0.00 [0.00, 0.00] |             |
| Influenza vaccination; n (%)                   | 247 (9.1%)         | 283 (10.4%)       | 0.045                    | 584 (7.8%)         | 639 (8.6%)        | 0.027       |
| Lipid screening; n (%)                         | 21 (0.8%)          | 23 (0.8%)         | 0.008                    | 38 (0.5%)          | 46 (0.6%)         | 0.014       |
| Nursing home; n (%)                            | 10 (0.4%)          | 8 (0.3%)          | 0.013                    | 4 (0.1%)           | 9 (0.1%)          | 0.023       |
| Any office visit; n (%)                        | 2,651 (97.4%)      | 2,654 (97.5%)     | 0.007                    | 7,250 (97.3%)      | 7,259 (97.4%)     | 0.007       |
| ER visit; n (%)                                | 217 (8.0%)         | 236 (8.7%)        | 0.025                    | 676 (9.1%)         | 717 (9.6%)        | 0.019       |
| Occurrence of inpatient hospitalization; n (%) | 111 (4.1%)         | 125 (4.6%)        | 0.025                    | 306 (4.1%)         | 334 (4.5%)        | 0.019       |
| Occurrence of laboratory tests; n (%)          | 2,043 (75.1%)      | 2,042 (75.0%)     | 0.001                    | 5,457 (73.2%)      | 5,463 (73.3%)     | 0.002       |
| Use of a statin; n (%)                         | 655 (24.1%)        | 694 (25.5%)       | 0.033                    | 1,837 (24.6%)      | 1,948 (26.1%)     | 0.034       |
| Use of ACE-inhibitors; n (%)                   | 262 (9.6%)         | 279 (10.2%)       | 0.021                    | 739 (9.9%)         | 800 (10.7%)       | 0.027       |
| Use of antidepressants; n (%)                  | 97 (3.6%)          | 124 (4.6%)        | 0.05                     | 334 (4.5%)         | 357 (4.8%)        | 0.015       |
| Use of any anticoagulant; n (%)                | 45 (1.7%)          | 54 (2.0%)         | 0.025                    | 130 (1.7%)         | 149 (2.0%)        | 0.019       |
| Use of ARBs; n (%)                             | 130 (4.8%)         | 140 (5.1%)        | 0.017                    | 288 (3.9%)         | 326 (4.4%)        | 0.026       |
| Use of Aspirin/dipyridamole; n (%)             | 3 (0.1%)           | 4 (0.1%)          | 0.01                     | 5 (0.1%)           | 7 (0.1%)          | 0.009       |
| Use of beta blockers; n (%)                    | 279 (10.2%)        | 309 (11.4%)       | 0.036                    | 853 (11.4%)        | 939 (12.6%)       | 0.035       |

|                                                                            |                           |                         |                    |                           |                         |                    |
|----------------------------------------------------------------------------|---------------------------|-------------------------|--------------------|---------------------------|-------------------------|--------------------|
| Use of calcium channel blockers; n (%)                                     | 52 (1.9%)                 | 57 (2.1%)               | 0.013              | 147 (2.0%)                | 187 (2.5%)              | 0.036              |
| Use of diabetes medications, except insulin; n (%)                         | 158 (5.8%)                | 159 (5.8%)              | 0.002              | 403 (5.4%)                | 464 (6.2%)              | 0.035              |
| Use of diclofenac, ibuprofen, indomethacin, ketoprofen, or naproxen; n (%) | 210 (7.7%)                | 203 (7.5%)              | 0.01               | 563 (7.6%)                | 613 (8.2%)              | 0.025              |
| Use of other antiplatelet agents; n (%)                                    | 3 (0.1%)                  | 3 (0.1%)                | 0                  | 10 (0.1%)                 | 11 (0.1%)               | 0.004              |
| Use of other hypertension drugs; n (%)                                     | 265 (9.7%)                | 287 (10.5%)             | 0.027              | 719 (9.6%)                | 798 (10.7%)             | 0.035              |
| Use of other lipid-lowering drugs; n (%)                                   | 151 (5.5%)                | 165 (6.1%)              | 0.022              | 38 (0.5%)                 | 46 (0.6%)               | 0.017              |
| Medicare/Commercial                                                        |                           |                         |                    | 436 (5.8%)                | 467 (6.3%)              |                    |
| ...Commercial; n (%)                                                       | 2,364 (86.8%)             | 2,367 (87.0%)           | 0.003              | 6,389 (85.7%)             | 6,295 (84.5%)           | 0.035              |
| ...Medicare; n (%)                                                         | 358 (13.2%)               | 355 (13.0%)             |                    | 1,065 (14.3%)             | 1,159 (15.5%)           |                    |
| Region                                                                     |                           |                         |                    |                           |                         |                    |
| ...Northeast; n (%)                                                        | 283 (10.4%)               | 304 (11.2%)             | 0.037              | 1,257 (16.9%)             | 1,322 (17.7%)           | 0.029              |
| ...Midwest; n (%)                                                          | 591 (21.7%)               | 582 (21.4%)             |                    | 1,584 (21.3%)             | 1,610 (21.6%)           |                    |
| ...South; n (%)                                                            | 1,418 (52.1%)             | 1,385 (50.9%)           |                    | 3,111 (41.7%)             | 3,022 (40.5%)           |                    |
| ...West; n (%)                                                             | 425 (15.6%)               | 447 (16.4%)             |                    | 1,424 (19.1%)             | 1,420 (19.1%)           |                    |
| ...Other; n (%)                                                            | 5 (0.2%)                  | 4 (0.1%)                |                    | 78 (1.0%)                 | 80 (1.1%)               |                    |
| Age                                                                        |                           |                         |                    |                           |                         |                    |
| ...mean (sd)                                                               | 52.16 (14.31)             | 52.29 (13.88)           | 0.009              | 52.58 (13.16)             | 52.99 (12.99)           | 0.032              |
| ...median [IQR]                                                            | 52.00 [42.00, 61.00]      | 53.00 [43.00, 61.00]    |                    | 54.00 [44.00, 61.00]      | 54.00 [45.00, 61.00]    |                    |
| Depression; n (%)                                                          | 41 (1.5%)                 | 45 (1.7%)               | 0.012              | 288 (3.9%)                | 319 (4.3%)              | 0.021              |
| Use of antibiotics; n (%)                                                  | 1,074 (39.5%)             | 1,125 (41.3%)           | 0.038              | 3,140 (42.1%)             | 3,212 (43.1%)           | 0.02               |
|                                                                            |                           |                         |                    |                           |                         |                    |
|                                                                            | <b>Optum CDM</b>          |                         |                    | <b>Truven MarketScan</b>  |                         |                    |
| <b>Variable</b>                                                            | <b>Methotrexate Users</b> | <b>Adalimumab users</b> | <b>Abs Std Dif</b> | <b>Methotrexate Users</b> | <b>Adalimumab users</b> | <b>Abs Std Dif</b> |
| Number of patients                                                         | 5,798                     | 5,798                   |                    | 15,699                    | 15,699                  |                    |

|                                                                            |                   |                   |       |                   |                   |       |
|----------------------------------------------------------------------------|-------------------|-------------------|-------|-------------------|-------------------|-------|
| Overweight/obesity; n (%)                                                  | 328 (5.7%)        | 315 (5.4%)        | 0.01  | 660 (4.2%)        | 648 (4.1%)        | 0.004 |
| Gender                                                                     |                   |                   |       |                   |                   |       |
| ...M = MALE; n (%)                                                         | 3,067 (52.9%)     | 3,076 (53.1%)     | 0.003 | 8,077 (51.4%)     | 8,121 (51.7%)     | 0.006 |
| ...F = FEMALE; n (%)                                                       | 2,731 (47.1%)     | 2,722 (46.9%)     |       | 7,622 (48.6%)     | 7,578 (48.3%)     |       |
| Smoking; n (%)                                                             | 275 (4.7%)        | 285 (4.9%)        | 0.008 | 627 (4.0%)        | 627 (4.0%)        | 0     |
| CCI Combined Comorbidity Score (180 days)                                  |                   |                   |       |                   |                   |       |
| ...mean (sd)                                                               | 0.08 (0.87)       | 0.07 (0.81)       | 0.007 | 0.05 (0.74)       | 0.06 (0.73)       | 0.008 |
| ...median [IQR]                                                            | 0.00 [0.00, 0.00] | 0.00 [0.00, 0.00] |       | 0.00 [0.00, 0.00] | 0.00 [0.00, 0.00] |       |
| Influenza vaccination; n (%)                                               | 607 (10.5%)       | 618 (10.7%)       | 0.006 | 1,374 (8.8%)      | 1,420 (9.0%)      | 0.01  |
| Lipid screening; n (%)                                                     | 63 (1.1%)         | 62 (1.1%)         | 0.002 | 132 (0.8%)        | 125 (0.8%)        | 0.005 |
| Nursing home; n (%)                                                        | 5 (0.1%)          | 4 (0.1%)          | 0.006 | 9 (0.1%)          | 9 (0.1%)          | 0     |
| Any office visit; n (%)                                                    | 5,679 (97.9%)     | 5,682 (98.0%)     | 0.004 | 15,422 (98.2%)    | 15,431 (98.3%)    | 0.004 |
| ER visit; n (%)                                                            | 485 (8.4%)        | 463 (8.0%)        | 0.014 | 1,591 (10.1%)     | 1,582 (10.1%)     | 0.002 |
| Occurrence of inpatient hospitalization; n (%)                             | 215 (3.7%)        | 211 (3.6%)        | 0.004 | 585 (3.7%)        | 583 (3.7%)        | 0.001 |
| Occurrence of laboratory tests; n (%)                                      | 4,549 (78.5%)     | 4,542 (78.3%)     | 0.003 | 12,930 (82.4%)    | 12,904 (82.2%)    | 0.004 |
| Use of a statin; n (%)                                                     | 1,176 (20.3%)     | 1,171 (20.2%)     | 0.002 | 3,145 (20.0%)     | 3,143 (20.0%)     | 0     |
| Use of ACE-inhibitors; n (%)                                               | 489 (8.4%)        | 494 (8.5%)        | 0.003 | 1,332 (8.5%)      | 1,351 (8.6%)      | 0.004 |
| Use of antidepressants; n (%)                                              | 247 (4.3%)        | 245 (4.2%)        | 0.002 | 734 (4.7%)        | 746 (4.8%)        | 0.004 |
| Use of any anticoagulant; n (%)                                            | 62 (1.1%)         | 68 (1.2%)         | 0.01  | 185 (1.2%)        | 194 (1.2%)        | 0.005 |
| Use of ARBs; n (%)                                                         | 206 (3.6%)        | 197 (3.4%)        | 0.008 | 513 (3.3%)        | 527 (3.4%)        | 0.005 |
| Use of Aspirin/dipyridamole; n (%)                                         | 9 (0.2%)          | 8 (0.1%)          | 0.005 | 22 (0.1%)         | 20 (0.1%)         | 0.003 |
| Use of beta blockers; n (%)                                                | 574 (9.9%)        | 565 (9.7%)        | 0.005 | 1,505 (9.6%)      | 1,523 (9.7%)      | 0.004 |
| Use of calcium channel blockers; n (%)                                     | 72 (1.2%)         | 55 (0.9%)         | 0.028 | 142 (0.9%)        | 144 (0.9%)        | 0.001 |
| Use of diabetes medications, except insulin; n (%)                         | 304 (5.2%)        | 308 (5.3%)        | 0.003 | 753 (4.8%)        | 738 (4.7%)        | 0.004 |
| Use of diclofenac, ibuprofen, indomethacin, ketoprofen, or naproxen; n (%) | 688 (11.9%)       | 684 (11.8%)       | 0.002 | 1,820 (11.6%)     | 1,842 (11.7%)     | 0.004 |

|                                           |                           |                         |                    |                           |                         |                    |
|-------------------------------------------|---------------------------|-------------------------|--------------------|---------------------------|-------------------------|--------------------|
| Use of other antiplatelet agents; n (%)   | 0 (0.0%)                  | 2 (0.0%)                | 0.026              | 15 (0.1%)                 | 12 (0.1%)               | 0.007              |
| Use of other hypertension drugs; n (%)    | 464 (8.0%)                | 459 (7.9%)              | 0.003              | 1,229 (7.8%)              | 1,276 (8.1%)            | 0.011              |
| Use of other lipid-lowering drugs; n (%)  | 313 (5.4%)                | 296 (5.1%)              | 0.013              | 132 (0.8%)                | 125 (0.8%)              | 0.005              |
| Medicare/Commercial                       |                           |                         |                    |                           |                         |                    |
| ...Commercial; n (%)                      | 5,353 (92.3%)             | 5,357 (92.4%)           | 0.003              | 14,729 (93.8%)            | 14,683 (93.5%)          | 0.012              |
| ...Medicare; n (%)                        | 445 (7.7%)                | 441 (7.6%)              |                    | 970 (6.2%)                | 1,016 (6.5%)            |                    |
| Region                                    |                           |                         |                    |                           |                         |                    |
| ...Northeast; n (%)                       | 500 (8.6%)                | 502 (8.7%)              | 0.017              | 2,307 (14.7%)             | 2,313 (14.7%)           | 0.009              |
| ...Midwest; n (%)                         | 1,512 (26.1%)             | 1,510 (26.0%)           |                    | 3,704 (23.6%)             | 3,760 (24.0%)           |                    |
| ...South; n (%)                           | 2,812 (48.5%)             | 2,777 (47.9%)           |                    | 6,949 (44.3%)             | 6,906 (44.0%)           |                    |
| ...West; n (%)                            | 968 (16.7%)               | 1,003 (17.3%)           |                    | 2,481 (15.8%)             | 2,461 (15.7%)           |                    |
| ...Other; n (%)                           | 6 (0.1%)                  | 6 (0.1%)                |                    | 258 (1.6%)                | 259 (1.6%)              |                    |
| Age                                       |                           |                         |                    |                           |                         |                    |
| ...mean (sd)                              | 48.17 (13.32)             | 48.16 (12.67)           | 0.001              | 47.60 (12.86)             | 47.57 (12.65)           | 0.003              |
| ...median [IQR]                           | 49.00 [39.00, 57.00]      | 49.00 [39.00, 57.00]    |                    | 49.00 [39.00, 57.00]      | 49.00 [39.00, 57.00]    |                    |
| Depression; n (%)                         | 144 (2.5%)                | 143 (2.5%)              | 0.001              | 777 (4.9%)                | 769 (4.9%)              | 0.002              |
| Use of antibiotics; n (%)                 | 2,261 (39.0%)             | 2,243 (38.7%)           | 0.006              | 6,255 (39.8%)             | 6,295 (40.1%)           | 0.005              |
|                                           |                           |                         |                    |                           |                         |                    |
|                                           | <b>Optum CDM</b>          |                         |                    | <b>Truven MarketScan</b>  |                         |                    |
| <b>Variable</b>                           | <b>Methotrexate Users</b> | <b>Apremilast users</b> | <b>Abs Std Dif</b> | <b>Methotrexate Users</b> | <b>Apremilast users</b> | <b>Abs Std Dif</b> |
| Number of patients                        | 1,623                     | 1,623                   |                    | 4,470                     | 4,470                   |                    |
| Overweight/obesity; n (%)                 | 82 (5.1%)                 | 87 (5.4%)               | 0.014              | 213 (4.8%)                | 242 (5.4%)              | 0.03               |
| Gender                                    |                           |                         |                    |                           |                         |                    |
| ...M = MALE; n (%)                        | 808 (49.8%)               | 820 (50.5%)             | 0.015              | 2,178 (48.7%)             | 2,173 (48.6%)           | 0.002              |
| ...F = FEMALE; n (%)                      | 815 (50.2%)               | 803 (49.5%)             |                    | 2,292 (51.3%)             | 2,297 (51.4%)           |                    |
| Smoking; n (%)                            | 63 (3.9%)                 | 57 (3.5%)               | 0.02               | 213 (4.8%)                | 242 (5.4%)              | 0.03               |
| CCI Combined Comorbidity Score (180 days) |                           |                         |                    |                           |                         |                    |
| ...mean (sd)                              | 0.14 (0.93)               | 0.14 (0.85)             | 0.008              | 0.07 (0.78)               | 0.08 (0.81)             | 0.02               |
| ...median [IQR]                           | 0.00 [0.00, 0.00]         | 0.00 [0.00, 0.00]       |                    | 0.00 [0.00, 0.00]         | 0.00 [0.00, 0.00]       |                    |

|                                                                            |               |               |       |               |               |       |
|----------------------------------------------------------------------------|---------------|---------------|-------|---------------|---------------|-------|
| Influenza vaccination; n (%)                                               | 190 (11.7%)   | 223 (13.7%)   | 0.061 | 427 (9.6%)    | 487 (10.9%)   | 0.044 |
| Lipid screening; n (%)                                                     | 9 (0.6%)      | 11 (0.7%)     | 0.016 | 31 (0.7%)     | 38 (0.9%)     | 0.018 |
| Nursing home; n (%)                                                        | 2 (0.1%)      | 4 (0.2%)      | 0.029 | 3 (0.1%)      | 5 (0.1%)      | 0.015 |
| Any office visit; n (%)                                                    | 1,602 (98.7%) | 1,605 (98.9%) | 0.017 | 4,417 (98.8%) | 4,421 (98.9%) | 0.008 |
| ER visit; n (%)                                                            | 106 (6.5%)    | 131 (8.1%)    | 0.059 | 410 (9.2%)    | 471 (10.5%)   | 0.046 |
| Occurrence of inpatient hospitalization; n (%)                             | 64 (3.9%)     | 63 (3.9%)     | 0.003 | 160 (3.6%)    | 191 (4.3%)    | 0.036 |
| Occurrence of laboratory tests; n (%)                                      | 1,089 (67.1%) | 1,142 (70.4%) | 0.07  | 3,193 (71.4%) | 3,261 (73.0%) | 0.034 |
| Use of a statin; n (%)                                                     | 333 (20.5%)   | 373 (23.0%)   | 0.06  | 992 (22.2%)   | 1,060 (23.7%) | 0.036 |
| Use of ACE-inhibitors; n (%)                                               | 137 (8.4%)    | 156 (9.6%)    | 0.041 | 387 (8.7%)    | 437 (9.8%)    | 0.039 |
| Use of antidepressants; n (%)                                              | 18 (1.1%)     | 15 (0.9%)     | 0.018 | 28 (0.6%)     | 30 (0.7%)     | 0.006 |
| Use of any anticoagulant; n (%)                                            | 25 (1.5%)     | 30 (1.8%)     | 0.024 | 54 (1.2%)     | 83 (1.9%)     | 0.053 |
| Use of ARBs; n (%)                                                         | 41 (2.5%)     | 47 (2.9%)     | 0.023 | 135 (3.0%)    | 151 (3.4%)    | 0.02  |
| Use of Aspirin/dipyridamole; n (%)                                         | 4 (0.2%)      | 5 (0.3%)      | 0.012 | 14 (0.3%)     | 15 (0.3%)     | 0.004 |
| Use of beta blockers; n (%)                                                | 190 (11.7%)   | 200 (12.3%)   | 0.019 | 470 (10.5%)   | 531 (11.9%)   | 0.043 |
| Use of calcium channel blockers; n (%)                                     | 16 (1.0%)     | 16 (1.0%)     | 0     | 35 (0.8%)     | 30 (0.7%)     | 0.013 |
| Use of diabetes medications, except insulin; n (%)                         | 88 (5.4%)     | 95 (5.9%)     | 0.019 | 208 (4.7%)    | 219 (4.9%)    | 0.012 |
| Use of diclofenac, ibuprofen, indomethacin, ketoprofen, or naproxen; n (%) | 195 (12.0%)   | 215 (13.2%)   | 0.037 | 465 (10.4%)   | 506 (11.3%)   | 0.029 |
| Use of other antiplatelet agents; n (%)                                    | 1 (0.1%)      | 2 (0.1%)      | 0.02  | 2 (0.0%)      | 2 (0.0%)      | 0     |
| Use of other hypertension drugs; n (%)                                     | 168 (10.4%)   | 182 (11.2%)   | 0.028 | 404 (9.0%)    | 453 (10.1%)   | 0.037 |
| Use of other lipid-lowering drugs; n (%)                                   | 53 (3.3%)     | 74 (4.6%)     | 0.067 | 203 (4.5%)    | 229 (5.1%)    | 0.027 |
| Medicare/Commercial                                                        |               |               |       |               |               |       |
| ...Commercial; n (%)                                                       | 1,378 (84.9%) | 1,389 (85.6%) | 0.019 | 4,034 (90.2%) | 3,990 (89.3%) | 0.032 |
| ...Medicare; n (%)                                                         | 245 (15.1%)   | 234 (14.4%)   |       | 436 (9.8%)    | 480 (10.7%)   |       |
| Region                                                                     |               |               |       |               |               |       |

|                                                |                           |                         |                    |                           |                         |                    |
|------------------------------------------------|---------------------------|-------------------------|--------------------|---------------------------|-------------------------|--------------------|
| ...Northeast; n (%)                            | 232 (14.3%)               | 209 (12.9%)             | 0.047              | 944 (21.1%)               | 989 (22.1%)             | 0.039              |
| ...Midwest; n (%)                              | 389 (24.0%)               | 380 (23.4%)             |                    | 950 (21.3%)               | 986 (22.1%)             |                    |
| ...South; n (%)                                | 685 (42.2%)               | 706 (43.5%)             |                    | 1,979 (44.3%)             | 1,928 (43.1%)           |                    |
| ...West; n (%)                                 | 315 (19.4%)               | 326 (20.1%)             |                    | 585 (13.1%)               | 553 (12.4%)             |                    |
| ...Other; n (%)                                | 2 (0.1%)                  | 2 (0.1%)                |                    | 12 (0.3%)                 | 14 (0.3%)               |                    |
| Age                                            |                           |                         |                    |                           |                         |                    |
| ...mean (sd)                                   | 51.07 (14.80)             | 51.37 (13.77)           | 0.021              | 50.18 (13.02)             | 50.51 (12.84)           | 0.025              |
| ...median [IQR]                                | 51.00 [40.00, 61.00]      | 52.00 [42.00, 61.00]    |                    | 52.00 [41.00, 59.00]      | 52.00 [42.00, 59.00]    |                    |
| Depression; n (%)                              | 32 (2.0%)                 | 27 (1.7%)               | 0.023              | 126 (2.8%)                | 140 (3.1%)              | 0.018              |
| Use of antibiotics; n (%)                      | 587 (36.2%)               | 617 (38.0%)             | 0.038              | 1,841 (41.2%)             | 1,890 (42.3%)           | 0.022              |
|                                                |                           |                         |                    |                           |                         |                    |
|                                                | <b>Optum CDM</b>          |                         |                    | <b>Truven MarketScan</b>  |                         |                    |
| <b>Variable</b>                                | <b>Methotrexate Users</b> | <b>Etanercept users</b> | <b>Abs Std Dif</b> | <b>Methotrexate Users</b> | <b>Etanercept users</b> | <b>Abs Std Dif</b> |
| Number of patients                             | 5,715                     | 5,715                   | 0.005              | 15,493                    | 15,493                  |                    |
| Overweight/obesity; n (%)                      | 308 (5.4%)                | 301 (5.3%)              |                    | 578 (3.7%)                | 581 (3.8%)              | 0.001              |
| Gender                                         |                           |                         |                    |                           |                         |                    |
| ...M = MALE; n (%)                             | 2,954 (51.7%)             | 2,971 (52.0%)           | 0.006              | 8,127 (52.5%)             | 8,078 (52.1%)           | 0.006              |
| ...F = FEMALE; n (%)                           | 2,761 (48.3%)             | 2,744 (48.0%)           |                    | 7,366 (47.5%)             | 7,415 (47.9%)           |                    |
| Smoking; n (%)                                 | 292 (5.1%)                | 275 (4.8%)              | 0.014              | 525 (3.4%)                | 525 (3.4%)              | 0                  |
| CCI Combined Comorbidity Score (180 days)      |                           |                         |                    |                           |                         |                    |
| ...mean (sd)                                   | 0.07 (0.87)               | 0.07 (0.84)             | 0.006              | 0.06 (0.74)               | 0.06 (0.73)             | 0                  |
| ...median [IQR]                                | 0.00 [0.00, 0.00]         | 0.00 [0.00, 0.00]       |                    | 0.00 [0.00, 0.00]         | 0.00 [0.00, 0.00]       |                    |
| Influenza vaccination; n (%)                   | 543 (9.5%)                | 544 (9.5%)              | 0.001              | 1,207 (7.8%)              | 1,232 (8.0%)            | 0.006              |
| Lipid screening; n (%)                         | 65 (1.1%)                 | 68 (1.2%)               | 0.005              | 95 (0.6%)                 | 105 (0.7%)              | 0.008              |
| Nursing home; n (%)                            | 6 (0.1%)                  | 4 (0.1%)                | 0.012              | 7 (0.0%)                  | 7 (0.0%)                | 0                  |
| Any office visit; n (%)                        | 5,569 (97.4%)             | 5,574 (97.5%)           | 0.006              | 7 (0.0%)                  | 7 (0.0%)                | 0                  |
| ER visit; n (%)                                | 423 (7.4%)                | 430 (7.5%)              | 0.005              | 1,552 (10.0%)             | 1,565 (10.1%)           | 0.003              |
| Occurrence of inpatient hospitalization; n (%) | 237 (4.1%)                | 219 (3.8%)              | 0.016              | 636 (4.1%)                | 643 (4.2%)              | 0.002              |
| Occurrence of laboratory tests; n (%)          | 4,351 (76.1%)             | 4,347 (76.1%)           | 0.002              | 12,148 (78.4%)            | 12,143 (78.4%)          | 0.001              |
| Use of a statin; n (%)                         | 1,101 (19.3%)             | 1,080 (18.9%)           | 0.009              | 2,972 (19.2%)             | 2,995 (19.3%)           | 0.004              |
| Use of ACE-inhibitors; n (%)                   | 454 (7.9%)                | 462 (8.1%)              | 0.005              | 1,279 (8.3%)              | 1,322 (8.5%)            | 0.01               |

|                                                                            |                      |                      |       |                          |                      |       |
|----------------------------------------------------------------------------|----------------------|----------------------|-------|--------------------------|----------------------|-------|
| Use of antidepressants; n (%)                                              | 303 (5.3%)           | 272 (4.8%)           | 0.025 | 762 (4.9%)               | 797 (5.1%)           | 0.01  |
| Use of any anticoagulant; n (%)                                            | 72 (1.3%)            | 72 (1.3%)            | 0     | 205 (1.3%)               | 210 (1.4%)           | 0.003 |
| Use of ARBs; n (%)                                                         | 207 (3.6%)           | 180 (3.1%)           | 0.026 | 545 (3.5%)               | 562 (3.6%)           | 0.006 |
| Use of Aspirin/dipyridamole; n (%)                                         | 5 (0.1%)             | 5 (0.1%)             | 0     | 16 (0.1%)                | 14 (0.1%)            | 0.004 |
| Use of beta blockers; n (%)                                                | 551 (9.6%)           | 549 (9.6%)           | 0.001 | 1,572 (10.1%)            | 1,562 (10.1%)        | 0.002 |
| Use of calcium channel blockers; n (%)                                     | 79 (1.4%)            | 73 (1.3%)            | 0.009 | 231 (1.5%)               | 232 (1.5%)           | 0.001 |
| Use of diabetes medications, except insulin; n (%)                         | 278 (4.9%)           | 284 (5.0%)           | 0.005 | 760 (4.9%)               | 765 (4.9%)           | 0.001 |
| Use of diclofenac, ibuprofen, indomethacin, ketoprofen, or naproxen; n (%) | 688 (12.0%)          | 665 (11.6%)          | 0.012 | 1,704 (11.0%)            | 1,723 (11.1%)        | 0.004 |
| Use of other antiplatelet agents; n (%)                                    | 0 (0.0%)             | 2 (0.0%)             | 0.026 | 7 (0.0%)                 | 10 (0.1%)            | 0.008 |
| Use of other hypertension drugs; n (%)                                     | 427 (7.5%)           | 418 (7.3%)           | 0.006 | 1,241 (8.0%)             | 1,271 (8.2%)         | 0.007 |
| Use of other lipid-lowering drugs; n (%)                                   | 260 (4.5%)           | 265 (4.6%)           | 0.004 | 770 (5.0%)               | 787 (5.1%)           | 0.005 |
| Medicare/Commercial                                                        |                      |                      |       |                          |                      |       |
| ...Commercial; n (%)                                                       | 5,341 (93.5%)        | 5,333 (93.3%)        | 0.006 | 14,272 (92.1%)           | 14,270 (92.1%)       | 0     |
| ...Medicare; n (%)                                                         | 374 (6.5%)           | 382 (6.7%)           |       | 1,221 (7.9%)             | 1,223 (7.9%)         |       |
| Region                                                                     |                      |                      |       |                          |                      |       |
| ...Northeast; n (%)                                                        | 495 (8.7%)           | 495 (8.7%)           | 0.025 | 2,248 (14.5%)            | 2,260 (14.6%)        | 0.015 |
| ...Midwest; n (%)                                                          | 1,483 (25.9%)        | 1,436 (25.1%)        |       | 3,810 (24.6%)            | 3,791 (24.5%)        |       |
| ...South; n (%)                                                            | 2,785 (48.7%)        | 2,787 (48.8%)        |       | 6,608 (42.7%)            | 6,695 (43.2%)        |       |
| ...West; n (%)                                                             | 944 (16.5%)          | 988 (17.3%)          |       | 2,556 (16.5%)            | 2,480 (16.0%)        |       |
| ...Other; n (%)                                                            | 8 (0.1%)             | 9 (0.2%)             |       | 271 (1.7%)               | 267 (1.7%)           |       |
| Age                                                                        |                      |                      |       |                          |                      |       |
| ...mean (sd)                                                               | 47.63 (13.15)        | 47.55 (12.76)        | 0.006 | 47.66 (13.29)            | 47.63 (13.05)        | 0.002 |
| ...median [IQR]                                                            | 48.00 [38.00, 57.00] | 48.00 [38.00, 56.00] |       | 49.00 [38.00, 57.00]     | 49.00 [38.00, 57.00] |       |
| Depression; n (%)                                                          | 144 (2.5%)           | 124 (2.2%)           | 0.023 | 762 (4.9%)               | 749 (4.8%)           | 0.004 |
| Use of antibiotics; n (%)                                                  | 2,225 (38.9%)        | 2,223 (38.9%)        | 0.001 | 6,178 (39.9%)            | 6,144 (39.7%)        | 0.004 |
|                                                                            |                      |                      |       |                          |                      |       |
|                                                                            | <b>Optum CDM</b>     |                      |       | <b>Truven MarketScan</b> |                      |       |

| Variable                                                                   | Methotrexate Users | Infliximab users  | Abs Std Dif | Methotrexate Users | Infliximab users  | Abs Std Dif |
|----------------------------------------------------------------------------|--------------------|-------------------|-------------|--------------------|-------------------|-------------|
| Number of patients                                                         | 406                | 406               |             | 1,027              | 1,027             |             |
| Overweight/obesity; n (%)                                                  | 26 (6.4%)          | 27 (6.7%)         | 0.01        | 67 (6.5%)          | 59 (5.7%)         | 0.032       |
| Gender                                                                     |                    |                   |             |                    |                   |             |
| ...M = MALE; n (%)                                                         | 212 (52.2%)        | 201 (49.5%)       | 0.054       | 450 (43.8%)        | 474 (46.2%)       | 0.047       |
| ...F = FEMALE; n (%)                                                       | 194 (47.8%)        | 205 (50.5%)       |             | 577 (56.2%)        | 553 (53.8%)       |             |
| Smoking; n (%)                                                             | 28 (6.9%)          | 24 (5.9%)         | 0.04        | 49 (4.8%)          | 50 (4.9%)         | 0.005       |
| CCI Combined Comorbidity Score (180 days)                                  |                    |                   |             |                    |                   |             |
| ...mean (sd)                                                               | 0.10 (0.97)        | 0.20 (1.07)       | 0.104       | 0.17 (0.96)        | 0.18 (1.04)       | 0.007       |
| ...median [IQR]                                                            | 0.00 [0.00, 0.00]  | 0.00 [0.00, 0.00] |             | 0.00 [0.00, 0.00]  | 0.00 [0.00, 0.00] |             |
| Influenza vaccination; n (%)                                               | 62 (15.3%)         | 61 (15.0%)        | 0.007       | 89 (8.7%)          | 105 (10.2%)       | 0.053       |
| Lipid screening; n (%)                                                     | 4 (1.0%)           | 4 (1.0%)          | 0           | 8 (0.8%)           | 10 (1.0%)         | 0.021       |
| Nursing home; n (%)                                                        | 0 (0.0%)           | 2 (0.5%)          | 0.1         | 2 (0.2%)           | 2 (0.2%)          | 0           |
| Any office visit; n (%)                                                    | 399 (98.3%)        | 400 (98.5%)       | 0.02        | 1,020 (99.3%)      | 1,018 (99.1%)     | 0.022       |
| ER visit; n (%)                                                            | 53 (13.1%)         | 43 (10.6%)        | 0.076       | 146 (14.2%)        | 148 (14.4%)       | 0.006       |
| Occurrence of inpatient hospitalization; n (%)                             | 34 (8.4%)          | 30 (7.4%)         | 0.037       | 70 (6.8%)          | 69 (6.7%)         | 0.004       |
| Occurrence of laboratory tests; n (%)                                      | 360 (88.7%)        | 362 (89.2%)       | 0.016       | 902 (87.8%)        | 907 (88.3%)       | 0.015       |
| Use of a statin; n (%)                                                     | 77 (19.0%)         | 85 (20.9%)        | 0.049       | 189 (18.4%)        | 217 (21.1%)       | 0.069       |
| Use of ACE-inhibitors; n (%)                                               | 39 (9.6%)          | 36 (8.9%)         | 0.026       | 77 (7.5%)          | 93 (9.1%)         | 0.057       |
| Use of antidepressants; n (%)                                              | 20 (4.9%)          | 25 (6.2%)         | 0.054       | 61 (5.9%)          | 72 (7.0%)         | 0.044       |
| Use of any anticoagulant; n (%)                                            | 5 (1.2%)           | 4 (1.0%)          | 0.024       | 8 (0.8%)           | 16 (1.6%)         | 0.073       |
| Use of ARBs; n (%)                                                         | 15 (3.7%)          | 18 (4.4%)         | 0.037       | 31 (3.0%)          | 41 (4.0%)         | 0.053       |
| Use of Aspirin/dipyridamole; n (%)                                         | 0 (0.0%)           | 0 (0.0%)          | -           | 1 (0.1%)           | 1 (0.1%)          | 0           |
| Use of beta blockers; n (%)                                                | 36 (8.9%)          | 43 (10.6%)        | 0.058       | 100 (9.7%)         | 118 (11.5%)       | 0.057       |
| Use of calcium channel blockers; n (%)                                     | 4 (1.0%)           | 5 (1.2%)          | 0.024       | 6 (0.6%)           | 14 (1.4%)         | 0.079       |
| Use of diabetes medications, except insulin; n (%)                         | 17 (4.2%)          | 24 (5.9%)         | 0.079       | 54 (5.3%)          | 63 (6.1%)         | 0.038       |
| Use of diclofenac, ibuprofen, indomethacin, ketoprofen, or naproxen; n (%) | 44 (10.8%)         | 48 (11.8%)        | 0.031       | 138 (13.4%)        | 127 (12.4%)       | 0.032       |

|                                           |                           |                          |                    |                           |                          |                    |
|-------------------------------------------|---------------------------|--------------------------|--------------------|---------------------------|--------------------------|--------------------|
| Use of other antiplatelet agents; n (%)   | 0 (0.0%)                  | 0 (0.0%)                 | -                  | 0 (0.0%)                  | 0 (0.0%)                 | -                  |
| Use of other hypertension drugs; n (%)    | 38 (9.4%)                 | 41 (10.1%)               | 0.025              | 89 (8.7%)                 | 98 (9.5%)                | 0.03               |
| Use of other lipid-lowering drugs; n (%)  | 20 (4.9%)                 | 24 (5.9%)                | 0.044              | 71 (6.9%)                 | 77 (7.5%)                | 0.023              |
| Medicare/Commercial                       |                           |                          |                    |                           |                          |                    |
| ...Commercial; n (%)                      | 355 (87.4%)               | 350 (86.2%)              | 0.036              | 953 (92.8%)               | 935 (91.0%)              | 0.064              |
| ...Medicare; n (%)                        | 51 (12.6%)                | 56 (13.8%)               |                    | 74 (7.2%)                 | 92 (9.0%)                |                    |
| Region                                    |                           |                          |                    |                           |                          |                    |
| ...Northeast; n (%)                       | 29 (7.1%)                 | 34 (8.4%)                | 0.057              | 169 (16.5%)               | 158 (15.4%)              | 0.052              |
| ...Midwest; n (%)                         | 131 (32.3%)               | 135 (33.3%)              |                    | 223 (21.7%)               | 244 (23.8%)              |                    |
| ...South; n (%)                           | 204 (50.2%)               | 195 (48.0%)              |                    | 540 (52.6%)               | 531 (51.7%)              |                    |
| ...West; n (%)                            | 42 (10.3%)                | 42 (10.3%)               |                    | 88 (8.6%)                 | 87 (8.5%)                |                    |
| ...Other; n (%)                           | 0 (0.0%)                  | 0 (0.0%)                 |                    | 7 (0.7%)                  | 7 (0.7%)                 |                    |
| Age                                       |                           |                          |                    |                           |                          |                    |
| ...mean (sd)                              | 49.81 (14.56)             | 50.15 (14.60)            | 0.023              | 47.50 (13.19)             | 48.18 (12.47)            | 0.053              |
| ...median [IQR]                           | 50.00 [40.00, 60.00]      | 50.00 [40.00, 59.00]     |                    | 48.00 [38.00, 57.00]      | 49.00 [40.00, 57.00]     |                    |
| Depression; n (%)                         | 15 (3.7%)                 | 12 (3.0%)                | 0.041              | 61 (5.9%)                 | 65 (6.3%)                | 0.016              |
| Use of antibiotics; n (%)                 | 161 (39.7%)               | 159 (39.2%)              | 0.01               | 490 (47.7%)               | 473 (46.1%)              | 0.033              |
|                                           |                           |                          |                    |                           |                          |                    |
|                                           | <b>Optum CDM</b>          |                          |                    | <b>Truven MarketScan</b>  |                          |                    |
| <b>Variable</b>                           | <b>Methotrexate Users</b> | <b>Ustekinumab users</b> | <b>Abs Std Dif</b> | <b>Methotrexate Users</b> | <b>Ustekinumab users</b> | <b>Abs Std Dif</b> |
| Number of patients                        | 4,037                     | 4,037                    |                    | 7,838                     | 7,838                    |                    |
| Overweight/obesity; n (%)                 | 235 (5.8%)                | 247 (6.1%)               | 0.013              | 336 (4.3%)                | 377 (4.8%)               | 0.025              |
| Gender                                    |                           |                          |                    |                           |                          |                    |
| ...M = MALE; n (%)                        | 2,250 (55.7%)             | 2,259 (56.0%)            | 0.023              | 4,273 (54.5%)             | 4,300 (54.9%)            | 0.007              |
| ...F = FEMALE; n (%)                      | 1,787 (44.3%)             | 1,777 (44.0%)            |                    | 3,565 (45.5%)             | 3,538 (45.1%)            |                    |
| Smoking; n (%)                            | 184 (4.6%)                | 183 (4.5%)               | 0.001              | 332 (4.2%)                | 356 (4.5%)               | 0.015              |
| CCI Combined Comorbidity Score (180 days) |                           |                          |                    |                           |                          |                    |
| ...mean (sd)                              | 0.08 (0.83)               | 0.08 (0.78)              | 0.001              | 0.03 (0.69)               | 0.05 (0.77)              | 0.022              |
| ...median [IQR]                           | 0.00 [0.00, 0.00]         | 0.00 [0.00, 0.00]        |                    | 0.00 [0.00, 0.00]         | 0.00 [0.00, 0.00]        |                    |
| Influenza vaccination; n (%)              | 458 (11.3%)               | 485 (12.0%)              | 0.021              | 656 (8.4%)                | 734 (9.4%)               | 0.035              |

|                                                                            |               |               |       |               |               |       |
|----------------------------------------------------------------------------|---------------|---------------|-------|---------------|---------------|-------|
| Lipid screening; n (%)                                                     | 31 (0.8%)     | 33 (0.8%)     | 0.006 | 61 (0.8%)     | 65 (0.8%)     | 0.006 |
| Nursing home; n (%)                                                        | 7 (0.2%)      | 6 (0.1%)      | 0.006 | 9 (0.1%)      | 9 (0.1%)      | 0     |
| Any office visit; n (%)                                                    | 3,981 (98.6%) | 3,978 (98.5%) | 0.006 | 7,734 (98.7%) | 7,732 (98.6%) | 0.002 |
| ER visit; n (%)                                                            | 322 (8.0%)    | 311 (7.7%)    | 0.01  | 682 (8.7%)    | 754 (9.6%)    | 0.032 |
| Occurrence of inpatient hospitalization; n (%)                             | 112 (2.8%)    | 115 (2.8%)    | 0.004 | 239 (3.0%)    | 259 (3.3%)    | 0.015 |
| Occurrence of laboratory tests; n (%)                                      | 3,165 (78.4%) | 3,197 (79.2%) | 0.019 | 6,322 (80.7%) | 6,329 (80.7%) | 0.002 |
| Use of a statin; n (%)                                                     | 728 (18.0%)   | 786 (19.5%)   | 0.037 | 1,483 (18.9%) | 1,619 (20.7%) | 0.044 |
| Use of ACE-inhibitors; n (%)                                               | 333 (8.2%)    | 342 (8.5%)    | 0.008 | 609 (7.8%)    | 706 (9.0%)    | 0.045 |
| Use of antidepressants; n (%)                                              | 88 (2.2%)     | 94 (2.3%)     | 0.01  | 220 (2.8%)    | 248 (3.2%)    | 0.021 |
| Use of any anticoagulant; n (%)                                            | 61 (1.5%)     | 59 (1.5%)     | 0.004 | 78 (1.0%)     | 94 (1.2%)     | 0.02  |
| Use of ARBs; n (%)                                                         | 99 (2.5%)     | 111 (2.7%)    | 0.019 | 208 (2.7%)    | 240 (3.1%)    | 0.025 |
| Use of Aspirin/dipyridamole; n (%)                                         | 4 (0.1%)      | 7 (0.2%)      | 0.02  | 12 (0.2%)     | 16 (0.2%)     | 0.012 |
| Use of beta blockers; n (%)                                                | 322 (8.0%)    | 324 (8.0%)    | 0.002 | 683 (8.7%)    | 777 (9.9%)    | 0.041 |
| Use of calcium channel blockers; n (%)                                     | 21 (0.5%)     | 17 (0.4%)     | 0.014 | 37 (0.5%)     | 34 (0.4%)     | 0.006 |
| Use of diabetes medications, except insulin; n (%)                         | 190 (4.7%)    | 197 (4.9%)    | 0.008 | 362 (4.6%)    | 416 (5.3%)    | 0.032 |
| Use of diclofenac, ibuprofen, indomethacin, ketoprofen, or naproxen; n (%) | 336 (8.3%)    | 345 (8.5%)    | 0.008 | 694 (8.9%)    | 691 (8.8%)    | 0.001 |
| Use of other antiplatelet agents; n (%)                                    | 1 (0.0%)      | 1 (0.0%)      | 0     | 2 (0.0%)      | 2 (0.0%)      | 0     |
| Use of other hypertension drugs; n (%)                                     | 278 (6.9%)    | 307 (7.6%)    | 0.028 | 602 (7.7%)    | 684 (8.7%)    | 0.038 |
| Use of other lipid-lowering drugs; n (%)                                   | 180 (4.5%)    | 185 (4.6%)    | 0.006 | 61 (0.8%)     | 65 (0.8%)     | 0.006 |
| Medicare/Commercial                                                        |               |               |       | 377 (4.8%)    | 426 (5.4%)    | 0.028 |
| ...Commercial; n (%)                                                       | 3,763 (93.2%) | 3,759 (93.1%) | 0.004 | 7,355 (93.8%) | 7,296 (93.1%) | 0.03  |
| ...Medicare; n (%)                                                         | 274 (6.8%)    | 278 (6.9%)    |       | 483 (6.2%)    | 542 (6.9%)    |       |
| Region                                                                     |               |               |       |               |               |       |
| ...Northeast; n (%)                                                        | 387 (9.6%)    | 409 (10.1%)   | 0.022 | 1,422 (18.1%) | 1,492 (19.0%) | 0.049 |
| ...Midwest; n (%)                                                          | 983 (24.3%)   | 971 (24.1%)   |       | 1,649 (21.0%) | 1,595 (20.3%) |       |
| ...South; n (%)                                                            | 1,991 (49.3%) | 1,997 (49.5%) |       | 3,593 (45.8%) | 3,560 (45.4%) |       |

|                           |                      |                      |       |                      |                      |       |
|---------------------------|----------------------|----------------------|-------|----------------------|----------------------|-------|
| ...West; n (%)            | 671 (16.6%)          | 656 (16.2%)          |       | 1,043 (13.3%)        | 1,016 (13.0%)        |       |
| ...Other; n (%)           | 5 (0.1%)             | 4 (0.1%)             |       | 131 (1.7%)           | 175 (2.2%)           |       |
| Age                       |                      |                      |       |                      |                      |       |
| ...mean (sd)              | 46.50 (13.49)        | 46.67 (12.79)        | 0.013 | 46.45 (13.08)        | 46.89 (12.86)        | 0.035 |
| ...median [IQR]           | 46.00 [37.00, 56.00] | 47.00 [38.00, 55.00] |       | 47.00 [37.00, 56.00] | 48.00 [38.00, 56.00] |       |
| Depression; n (%)         | 74 (1.8%)            | 76 (1.9%)            | 0.004 | 333 (4.2%)           | 363 (4.6%)           | 0.019 |
| Use of antibiotics; n (%) | 1,466 (36.3%)        | 1,491 (36.9%)        | 0.013 | 2,939 (37.5%)        | 3,013 (38.4%)        | 0.019 |

---

<sup>a</sup> Absolute standardized difference

<sup>b</sup> Interquartile range

eTable 6. Overall and subtypes of serious infections in patient with psoriasis on systemic medications compared to methotrexate in Optum© Clinformatics® Data Mart

| Exposure                         | No. of Patients in Reference Group (MTX) <sup>a</sup> | Events in Reference Group (MTX) <sup>b</sup> | Incidence Rate <sup>c</sup> in Reference Group | No. of Patients in Exposure Group | Events in Exposure Group | Incidence Rate in Exposure Group | Rate Difference (95% CI) <sup>d</sup> | Unadjusted HR <sup>e</sup> (95% CI) | p              | PS-Adjusted HR (95% CI) | p    |
|----------------------------------|-------------------------------------------------------|----------------------------------------------|------------------------------------------------|-----------------------------------|--------------------------|----------------------------------|---------------------------------------|-------------------------------------|----------------|-------------------------|------|
| <b>Acitretin</b>                 |                                                       |                                              |                                                |                                   |                          |                                  |                                       |                                     |                |                         |      |
| Overall Serious Infection        | 9048                                                  | 127                                          | 14.46                                          | 2726                              | 30                       | 14.44                            | -0.02 (-5.76, 5.73)                   | 1.00 (0.67, 1.50)                   | 0.99           | 1.33 (0.78, 2.27)       | 0.29 |
| Bacteremia/Sepsis                |                                                       | 28                                           | 3.17                                           |                                   | 8                        | 3.83                             | 0.66 (-2.24, 3.56)                    | 1.19 (0.54, 2.63)                   | 0.66           | 1.49 (0.51, 4.32)       | 0.46 |
| Cellulitis/soft-tissue infection |                                                       | 36                                           | 4.07                                           |                                   | 17                       | 8.16                             | 4.09 (-0.01, 8.19)                    | 1.87 (1.05, 3.33)                   | 0.03           | 2.11 (0.93, 4.79)       | 0.08 |
| Endocarditis                     |                                                       | 0                                            | 0                                              |                                   | 0                        | 0                                | 0                                     | 1.00 (1.00, 1.00)                   | * <sup>f</sup> | 1.00 (1.00, 1.00)       | *    |
| Meningitis/Encephalitis          |                                                       | 4                                            | 0.45                                           |                                   | 1                        | 0.48                             | 0.03 (-1.01, 1.06)                    | 1.36 (0.15, 12.37)                  | 0.79           | *                       | 0.90 |
| Pneumonia                        |                                                       | 51                                           | 5.78                                           |                                   | 6                        | 2.87                             | -2.91 (-5.70, -0.12)                  | 0.52 (0.22, 1.22)                   | 0.13           | 0.79 (0.28, 2.22)       | 0.65 |
| Pyelonephritis                   |                                                       | 6                                            | 0.68                                           |                                   | 0                        | 0                                | -0.68 (-1.22, -0.14)                  | *                                   | *              | *                       | *    |
| Septic arthritis/osteomyelitis   |                                                       | 6                                            | 0.68                                           |                                   | 0                        | 0                                | -0.68 (-1.22, -0.14)                  | *                                   | *              | *                       | *    |
| <b>Adalimumab</b>                |                                                       |                                              |                                                |                                   |                          |                                  |                                       |                                     |                |                         |      |
| Overall Serious Infection        | 8470                                                  | 112                                          | 14.24                                          | 7181                              | 79                       | 10.33                            | -3.91 (-7.39, -0.42)                  | 0.73 (0.55, 0.98)                   | 0.03           | 1.26 (0.86, 1.85)       | 0.23 |
| Bacteremia/Sepsis                |                                                       | 26                                           | 3.29                                           |                                   | 18                       | 2.34                             | -0.94 (-2.61, 0.72)                   | 0.70 (0.38, 1.27)                   | 0.24           | 1.98 (0.77, 5.12)       | 0.16 |
| Cellulitis/soft-tissue infection |                                                       | 28                                           | 3.54                                           |                                   | 36                       | 4.69                             | 1.15 (-0.86, 3.17)                    | 1.39 (0.84, 2.27)                   | 0.2            | 1.93 (1.03, 3.63)       | 0.04 |
| Endocarditis                     |                                                       | 0                                            | 0                                              |                                   | 0                        | 0                                | 0                                     | 1.00 (1.00, 1.00)                   | *              | 1.00 (1.00, 1.00)       | *    |
| Meningitis/Encephalitis          |                                                       | 2                                            | 0.25                                           |                                   | 0                        | 0                                | -0.25 (-0.60, 0.10)                   | *                                   | *              | *                       | *    |
| Pneumonia                        |                                                       | 48                                           | 6.07                                           |                                   | 23                       | 2.99                             | -3.08 (-5.19, -0.97)                  | 0.49 (0.30, 0.81)                   | <0.01          | 0.94 (0.49, 1.79)       | 0.84 |
| Pyelonephritis                   |                                                       | 5                                            | 0.63                                           |                                   | 4                        | 0.52                             | -0.11 (-0.86, 0.64)                   | 0.83 (0.22, 3.10)                   | 0.78           | 0.81 (0.11, 5.83)       | 0.84 |
| Septic arthritis/osteomyelitis   |                                                       | 7                                            | 0.88                                           |                                   | 2                        | 0.26                             | -0.62 (-1.37, 0.12)                   | 0.29 (0.06, 1.41)                   | 0.13           | 0.32 (0.06, 1.67)       | 0.18 |
| <b>Apremilast</b>                |                                                       |                                              |                                                |                                   |                          |                                  |                                       |                                     |                |                         |      |
| Overall Serious Infection        | 9383                                                  | 134                                          | 14.62                                          | 1623                              | 4                        | 4.36                             | -10.27 (-15.20, -5.33)                | 0.30 (0.11, 0.80)                   | 0.02           | 0.39 (0.13, 1.20)       | 0.10 |

|                                  |      |     |       |      |    |       |                       |                     |       |                    |      |
|----------------------------------|------|-----|-------|------|----|-------|-----------------------|---------------------|-------|--------------------|------|
| Bacteremia/Sepsis                |      | 30  | 3.25  |      | 1  | 1.09  | -2.17 (-4.60, 0.26)   | 0.34 (0.05, 2.52)   | 0.29  | 1.12 (0.07, 17.95) | 0.94 |
| Cellulitis/soft-tissue infection |      | 38  | 4.12  |      | 2  | 2.17  | -1.95 (-5.23, 1.34)   | 0.45 (0.11, 1.88)   | 0.28  | 0.41 (0.08, 2.02)  | 0.27 |
| Endocarditis                     |      | 0   | 0     |      | 0  | 0     | 0                     | *                   | *     | *                  | *    |
| Meningitis/Encephalitis          |      | 4   | 0.43  |      | 0  | 0     | 0                     | *                   | 0.86  | *                  | *    |
| Pneumonia                        |      | 54  | 5.86  |      | 1  | 1.09  | -4.78 (-7.42, -2.13)  | 0.18 (0.03, 1.31)   | 0.09  | 0.28 (0.03, 2.42)  | 0.25 |
| Pyelonephritis                   |      | 6   | 0.65  |      | 0  | 0     | 0                     | *                   | *     | *                  | *    |
| Septic arthritis/osteomyelitis   |      | 7   | 0.76  |      | 0  | 0     | -0.76 (-1.32, -0.20)  | *                   | *     | *                  | *    |
| <b>Etanercept</b>                |      |     |       |      |    |       |                       |                     |       |                    |      |
| Overall Serious Infection        | 8475 | 118 | 14.98 | 7102 | 68 | 8.05  | -6.94 (-10.25, -3.63) | 0.54 (0.40, 0.72)   | <0.01 | 0.78 (0.54, 1.15)  | 0.21 |
| Bacteremia/Sepsis                |      | 27  | 3.41  |      | 9  | 1.06  | -2.35 (-3.81, -0.89)  | 0.31 (0.14, 0.65)   | <0.01 | 0.64 (0.24, 1.67)  | 0.36 |
| Cellulitis/soft-tissue infection |      | 33  | 4.16  |      | 35 | 4.13  | -0.03 (-2.00, 1.94)   | 1.02 (0.63, 1.64)   | 0.93  | 1.16 (0.65, 2.07)  | 0.61 |
| Endocarditis                     |      | 0   | 0.5   |      | 1  | 0     | -0.50 (-1.00, -0.01)  | *                   | *     | *                  | *    |
| Meningitis/Encephalitis          |      | 4   | 0.5   |      | 0  | 0     | -0.50 (-1.00, -0.01)  | *                   | *     | *                  | *    |
| Pneumonia                        |      | 50  | 6.32  |      | 19 | 2.24  | -4.08 (-6.10, -2.06)  | 0.36 (0.21, 0.60)   | <0.01 | 0.61 (0.30, 1.21)  | 0.15 |
| Pyelonephritis                   |      | 4   | 0.5   |      | 2  | 0.24  | -0.27 (-0.86, 0.32)   | 0.42 (0.08, 2.30)   | 0.32  | 0.64 (0.09, 4.59)  | 0.66 |
| Septic arthritis/osteomyelitis   |      | 5   | 0.63  |      | 4  | 0.47  | -0.16 (-0.88, 0.56)   | 0.74 (0.20, 2.79)   | 0.66  | 0.53 (0.09, 3.21)  | 0.49 |
| <b>Infliximab</b>                |      |     |       |      |    |       |                       |                     |       |                    |      |
| Overall Serious Infection        | 9378 | 132 | 14.58 | 408  | 6  | 17.67 | 3.09 (-11.27, 17.45)  | 1.22 (0.54, 2.76)   | 0.62  | 2.01 (0.50, 8.02)  | 0.32 |
| Bacteremia/Sepsis                |      | 30  | 3.29  |      | 1  | 2.93  | -0.36 (-6.23, 5.50)   | 0.91 (0.12, 6.67)   | 0.93  | *                  | *    |
| Cellulitis/soft-tissue infection |      | 39  | 4.28  |      | 1  | 2.94  | -1.35 (-7.26, 4.57)   | 0.64 (0.09, 4.68)   | 0.66  | 1.01 (0.06, 16.08) | 1.00 |
| Endocarditis                     |      | 0   | 0     |      | 0  | 0     | 0                     | *                   | *     | *                  | *    |
| Meningitis/Encephalitis          |      | 3   | 0.33  |      | 1  | 2.93  | 2.60 (-3.15, 8.36)    | 10.24 (1.06, 98.78) | 0.04  | *                  | *    |
| Pneumonia                        |      | 52  | 5.72  |      | 2  | 5.86  | 0.14 (-8.12, 8.41)    | 1.02 (0.25, 4.17)   | 0.98  | 0.98 (0.14, 6.94)  | 0.98 |
| Pyelonephritis                   |      | 6   | 0.66  |      | 1  | 2.93  | 2.27 (-3.50, 8.04)    | 4.36 (0.52, 36.36)  | 0.17  | *                  | *    |
| Septic arthritis/osteomyelitis   |      | 7   | 0.77  |      | 0  | 0     | -0.77 (-1.34, -0.20)  | *                   | 0.85  | *                  | *    |
| <b>Ustekinumab</b>               |      |     |       |      |    |       |                       |                     |       |                    |      |
| Overall Serious Infection        | 9167 | 133 | 14.95 | 4085 | 21 | 5.57  | -9.37 (-12.86, -5.89) | 0.38 (0.24, 0.61)   | <0.01 | 0.54 (0.32, 0.92)  | 0.02 |

|                                  |  |    |      |  |   |      |                      |                   |       |                   |      |
|----------------------------------|--|----|------|--|---|------|----------------------|-------------------|-------|-------------------|------|
| Bacteremia/Sepsis                |  | 30 | 3.35 |  | 6 | 1.59 | -1.76 (-3.51, -0.02) | 0.48 (0.20, 1.15) | 0.1   | 1.42 (0.40, 5.04) | 0.59 |
| Cellulitis/soft-tissue infection |  | 37 | 4.13 |  | 9 | 2.38 | -1.75 (-3.80, 0.30)  | 0.55 (0.26, 1.13) | 0.11  | 0.73 (0.31, 1.73) | 0.47 |
| Endocarditis                     |  | 0  | 0    |  | 0 | 0    | 0                    | *                 | *     | *                 | *    |
| Meningitis/Encephalitis          |  | 4  | 0.45 |  | 0 | 0    | -0.45 (-0.88, -0.01) | *                 | *     | *                 | *    |
| Pneumonia                        |  | 54 | 6.04 |  | 5 | 1.32 | -4.71 (-6.70, -2.73) | 0.24 (0.09, 0.59) | <0.01 | 0.36 (0.13, 0.99) | 0.05 |
| Pyelonephritis                   |  | 6  | 0.67 |  | 0 | 0    | -0.67 (-1.20, -0.13) | *                 | *     | *                 | *    |
| Septic arthritis/osteomyelitis   |  | 7  | 0.78 |  | 2 | 0.53 | -0.25 (-1.19, 0.68)  | 0.76 (0.16, 3.70) | 0.73  | 0.52 (0.09, 2.83) | 0.45 |

---

<sup>a</sup> MTX, methotrexate

<sup>b</sup> The sum of events in the sub analyses of serious infections may be greater than the number of events in the overall serious infection analysis if a patient experienced greater than one serious infectious event.

<sup>c</sup> Incident rate in 1000 person-years

<sup>d</sup> CI, confidence interval

<sup>e</sup> HR, hazard ratio

<sup>f</sup> HR not calculated due to zero events in either exposure or reference group

eTable 7. Overall and subtypes of serious infections in patient with psoriasis on systemic medications compared to methotrexate in Truven MarketScan

| Exposure                         | No. of Patients in Reference Group (MTX <sup>a</sup> ) | Events in Reference Group (MTX) <sup>b</sup> | Incidence Rate <sup>c</sup> in Reference Group | No. of Patients in Exposure Group | Events in Exposure Group | Incidence Rate in Exposure Group | Rate Difference (95% CI <sup>d</sup> ) | Unadjusted HR <sup>e</sup> (95% CI) | p     | PS-Adjusted HR (95% CI) | p    |
|----------------------------------|--------------------------------------------------------|----------------------------------------------|------------------------------------------------|-----------------------------------|--------------------------|----------------------------------|----------------------------------------|-------------------------------------|-------|-------------------------|------|
| <b>Acitretin</b>                 |                                                        |                                              |                                                |                                   |                          |                                  |                                        |                                     |       |                         |      |
| Overall Serious Infection        | 21,935                                                 | 258                                          | 12.11                                          | 7,456                             | 81                       | 13.68                            | 1.57 (-1.75, 4.90)                     | 1.14 (0.89, 1.46)                   | 0.31  | 1.02 (0.76, 1.38)       | 0.87 |
| Bacteremia/Sepsis                |                                                        | 60                                           | 2.79                                           |                                   | 15                       | 2.52                             | -0.28 (-1.74, 1.18)                    | 0.92 (0.52, 1.63)                   | 0.79  | 0.79 (0.41, 1.50)       | 0.46 |
| Cellulitis/soft-tissue infection |                                                        | 74                                           | 3.45                                           |                                   | 36                       | 6.05                             | 2.60 (0.48, 4.73)                      | 1.72 (1.15, 2.56)                   | <0.01 | 1.65 (0.99, 2.73)       | 0.05 |
| Endocarditis                     |                                                        | 0                                            | 0                                              |                                   | 0                        | 0                                | *                                      | * <sup>f</sup>                      | *     | *                       | *    |
| Meningitis/Encephalitis          |                                                        | 4                                            | 0.19                                           |                                   | 0                        | 0                                | -0.19 (-0.37, -0.00)                   | *                                   | *     | *                       | *    |
| Pneumonia                        |                                                        | 117                                          | 5.46                                           |                                   | 30                       | 5.04                             | -0.42 (-2.48, 1.63)                    | 0.95 (0.64, 1.43)                   | 0.82  | 0.87 (0.54, 1.39)       | 0.56 |
| Pyelonephritis                   |                                                        | 6                                            | 0.28                                           |                                   | 2                        | 0.34                             | 0.06 (-0.46, 0.57)                     | 1.24 (0.25, 6.17)                   | 0.79  | 1.46 (0.21, 10.41)      | 0.70 |
| Septic arthritis/osteomyelitis   |                                                        | 6                                            | 0.28                                           |                                   | 3                        | 0.5                              | 0.22 (-0.39, 0.83)                     | 1.73 (0.43, 6.95)                   | 0.44  | 1.22 (0.24, 6.09)       | 0.81 |
| <b>Adalimumab</b>                |                                                        |                                              |                                                |                                   |                          |                                  |                                        |                                     |       |                         |      |
| Overall Serious Infection        | 20,609                                                 | 229                                          | 12.14                                          | 17,912                            | 197                      | 9.75                             | -2.39 (-4.47, -0.31)                   | 0.80 (0.66, 0.97)                   | 0.02  | 1.02 (0.82, 1.28)       | 0.84 |
| Bacteremia/Sepsis                |                                                        | 52                                           | 2.74                                           |                                   | 37                       | 1.82                             | -0.91 (-1.86, 0.03)                    | 0.67 (0.44, 1.02)                   | 0.06  | 0.90 (0.55, 1.46)       | 0.66 |
| Cellulitis/soft-tissue infection |                                                        | 69                                           | 3.63                                           |                                   | 81                       | 3.99                             | 0.36 (-0.86, 1.58)                     | 1.14 (0.83, 1.57)                   | 0.42  | 1.19 (0.82, 1.72)       | 0.36 |
| Endocarditis                     |                                                        | 0                                            | 0                                              |                                   | 0                        | 0                                | *                                      | *                                   | *     | *                       | *    |
| Meningitis/Encephalitis          |                                                        | 4                                            | 0.21                                           |                                   | 2                        | 0.1                              | -0.11 (-0.36, 0.14)                    | 0.46 (0.08, 2.52)                   | 0.37  | 0.78 (0.11, 5.63)       | 0.81 |
| Pneumonia                        |                                                        | 103                                          | 5.43                                           |                                   | 75                       | 3.69                             | -1.74 (-3.08, -0.40)                   | 0.66 (0.49, 0.88)                   | <0.01 | 0.94 (0.66, 1.34)       | 0.74 |
| Pyelonephritis                   |                                                        | 4                                            | 0.21                                           |                                   | 4                        | 0.2                              | -0.01 (-0.30, 0.27)                    | 0.88 (0.22, 3.51)                   | 0.85  | 1.40 (0.26, 7.64)       | 0.70 |
| Septic arthritis/osteomyelitis   |                                                        | 6                                            | 0.32                                           |                                   | 6                        | 0.29                             | -0.02 (-0.37, 0.33)                    | 0.94 (0.30, 2.93)                   | 0.92  | 1.20 (0.34, 4.26)       | 0.78 |
| <b>Apremilast</b>                |                                                        |                                              |                                                |                                   |                          |                                  |                                        |                                     |       |                         |      |
| Overall Serious Infection        | 22,987                                                 | 288                                          | 12.72                                          | 4,476                             | 11                       | 5.35                             | -7.37 (-10.86, -3.88)                  | 0.45 (0.25, 0.82)                   | <0.01 | 0.54 (0.27, 1.09)       | 0.09 |
| Bacteremia/Sepsis                |                                                        | 64                                           | 2.8                                            |                                   | 4                        | 1.94                             | -0.86 (-2.88, 1.17)                    | 0.71 (0.25, 1.98)                   | 0.51  | 0.83 (0.24, 2.84)       | 0.77 |

|                                  |        |     |       |        |     |       |                      |                    |       |                   |       |
|----------------------------------|--------|-----|-------|--------|-----|-------|----------------------|--------------------|-------|-------------------|-------|
| Cellulitis/soft-tissue infection |        | 85  | 3.73  |        | 4   | 1.94  | -1.78 (-3.85, 0.28)  | 0.49 (0.18, 1.36)  | 0.17  | 0.58 (0.18, 1.84) | 0.35  |
| Endocarditis                     |        | 0   | 0     |        | 1   | 0.49  | 0.49                 | *                  | *     | *                 | *     |
| Meningitis/Encephalitis          |        | 4   | 0.17  |        | 0   | 0     | *                    | *                  | *     | *                 | *     |
| Pneumonia                        |        | 132 | 5.8   |        | 4   | 1.94  | -3.86 (-6.00, -1.71) | 0.39 (0.14, 1.07)  | 0.07  | 0.47 (0.15, 1.44) | 0.19  |
| Pyelonephritis                   |        | 6   | 0.26  |        | 0   | 0     | -0.26 (-0.47, -0.05) | *                  | *     | *                 | *     |
| Septic arthritis/osteomyelitis   |        | 6   | 0.26  |        | 0   | 0     | -0.26 (-0.47, -0.05) | *                  | *     | *                 | *     |
| <b>Etanercept</b>                |        |     |       |        |     |       |                      |                    |       |                   |       |
| Overall Serious Infection        | 20,878 | 224 | 11.6  | 16,791 | 168 | 7.66  | -3.95 (-5.86, -2.03) | 0.66 (0.54, 0.80)  | <0.01 | 0.74 (0.59, 0.93) | 0.01  |
| Bacteremia/Sepsis                |        | 51  | 2.62  |        | 28  | 1.27  | -1.35 (-2.21, -0.49) | 0.44 (0.27, 0.70)  | <0.01 | 0.48 (0.29, 0.79) | <0.01 |
| Cellulitis/soft-tissue infection |        | 60  | 3.09  |        | 71  | 3.23  | 0.14 (-0.95, 1.22)   | 1.12 (0.79, 1.58)  | 0.52  | 1.16 (0.79, 1.72) | 0.45  |
| Endocarditis                     |        | 0   | 0     |        | 1   | 0.49  | 0.49 (-0.47, 1.44)   | *                  | *     | *                 | *     |
| Meningitis/Encephalitis          |        | 4   | 0.17  |        | 0   | 0     | -0.17 (-0.35, -0.00) | *                  | *     | *                 | *     |
| Pneumonia                        |        | 132 | 5.8   |        | 4   | 1.94  | -3.86 (-6.00, -1.71) | 0.39 (0.14, 1.07)  | 0.07  | 0.47 (0.15, 1.44) | 0.19  |
| Pyelonephritis                   |        | 6   | 0.26  |        | 0   | 0     | -0.26 (-0.47, -0.05) | *                  | *     | *                 | *     |
| Septic arthritis/osteomyelitis   |        | 6   | 0.26  |        | 0   | 0     | -0.26 (-0.47, -0.05) | *                  | *     | *                 | *     |
| <b>Infliximab</b>                |        |     |       |        |     |       |                      |                    |       |                   |       |
| Overall Serious Infection        | 22,642 | 253 | 11.68 | 1,027  | 20  | 17.08 | 5.41 (-2.22, 13.03)  | 1.44 (0.91, 2.27)  | 0.12  | 1.36 (0.67, 2.73) | 0.39  |
| Bacteremia/Sepsis                |        | 59  | 2.7   |        | 3   | 2.54  | -0.16 (-3.12, 2.80)  | 0.90 (0.28, 2.87)  | 0.86  | 1.29 (0.21, 7.78) | 0.78  |
| Cellulitis/soft-tissue infection |        | 68  | 3.12  |        | 9   | 7.65  | 4.53 (-0.52, 9.58)   | 2.51 (1.25, 5.04)  | <0.01 | 1.95 (0.60, 6.35) | 0.27  |
| Endocarditis                     |        | 0   | 0     |        | 1   | 0.49  | 0.49 (-0.47, 1.44)   | *                  | *     | *                 | *     |
| Meningitis/Encephalitis          |        | 4   | 0.18  |        | 0   | 0     | -0.18 (-0.36, -0.00) | *                  | *     | *                 | *     |
| Pneumonia                        |        | 118 | 5.42  |        | 6   | 5.1   | -0.32 (-4.52, 3.87)  | 0.91 (0.40, 2.07)  | 0.82  | 0.75 (0.25, 2.25) | 0.61  |
| Pyelonephritis                   |        | 6   | 0.27  |        | 2   | 1.7   | 1.42 (-0.94, 3.79)   | 6.68 (1.35, 33.15) | 0.02  | *                 | *     |
| Septic arthritis/osteomyelitis   |        | 5   | 0.22  |        | 1   | 0.97  | 0.75 (-1.67, 3.18)   | 3.79 (0.44, 32.40) | 0.22  | *                 | *     |
| <b>Ustekinumab</b>               |        |     |       |        |     |       |                      |                    |       |                   |       |
| Overall Serious Infection        | 22,556 | 280 | 12.7  | 7,841  | 56  | 7.06  | -5.63 (-8.01, -3.26) | 0.56 (0.42, 0.75)  | <0.01 | 0.70 (0.49, 0.99) | 0.05  |

|                                  |  |     |      |  |    |      |                      |                   |       |                   |      |
|----------------------------------|--|-----|------|--|----|------|----------------------|-------------------|-------|-------------------|------|
| Bacteremia/Sepsis                |  | 62  | 2.79 |  | 10 | 1.62 | -1.53 (-2.57, -0.49) | 0.48 (0.24, 0.93) | 0.03  | 0.66 (0.29, 1.49) | 0.32 |
| Cellulitis/soft-tissue infection |  | 84  | 3.78 |  | 22 | 2.77 | -1.02 (-2.43, 0.40)  | 0.73 (0.46, 1.18) | 0.2   | 0.95 (0.52, 1.72) | 0.86 |
| Endocarditis                     |  | 0   | 0    |  | 0  | 0    | 0                    | *                 | *     | *                 | *    |
| Meningitis/Encephalitis          |  | 4   | 0.18 |  | 0  | 0    | -0.18 (-0.36, -0.00) | *                 | *     | *                 | *    |
| Pneumonia                        |  | 127 | 5.73 |  | 23 | 2.89 | -2.84 (-4.38, -1.29) | 0.51 (0.32, 0.79) | <0.01 | 0.59 (0.35, 1.00) | 0.05 |
| Pyelonephritis                   |  | 6   | 0.27 |  | 3  | 0.38 | 0.11 (-0.37, 0.58)   | 1.35 (0.34, 5.41) | 0.67  | 1.32 (0.22, 7.93) | 0.76 |
| Septic arthritis/osteomyelitis   |  | 6   | 0.27 |  | 0  | 0    | -0.27 (-0.48, -0.05) | *                 | *     | *                 | *    |

<sup>a</sup> MTX, methotrexate

<sup>b</sup> The sum of events in the sub analyses of serious infections may be greater than the number of events in the overall serious infection analysis if a patient experienced greater than one serious infectious event.

<sup>c</sup> Incident rate in 1000 person-years

<sup>d</sup> CI, confidence interval

<sup>e</sup> HR, hazard ratio

<sup>f</sup> HR not calculated due to zero events in either exposure or reference group

eTable 8. Overall serious infections in patients with psoriasis and psoriatic arthritis on systemic medications compared to methotrexate in Optum© Clinformatics® Data Mart

| <b>Exposure</b>    | <b>No. of Patients in Reference Group (MTX)<sup>a</sup></b> | <b>Events in Reference Group (MTX)</b> | <b>No. of Patients in Exposure Group</b> | <b>Events in Exposure Group</b> | <b>Unadjusted HR</b> | <b>p</b> | <b>PS-Adjusted HR</b> | <b>p</b> |
|--------------------|-------------------------------------------------------------|----------------------------------------|------------------------------------------|---------------------------------|----------------------|----------|-----------------------|----------|
| <b>Acitretin</b>   | 10,241                                                      | 147                                    | 2800                                     | 33                              | 1.06 (0.73, 1.56)    | 0.75     | 1.33 (0.81, 2.19)     | 0.26     |
| <b>Adalimumab</b>  | 9,467                                                       | 126                                    | 7,792                                    | 85                              | 0.73 (0.55, 0.96)    | 0.02     | 1.23 (0.86, 1.75)     | 0.25     |
| <b>Apremilast</b>  | 10,553                                                      | 155                                    | 1,758                                    | 5                               | 0.34 (0.14, 0.83)    | 0.02     | 0.43 (0.16, 1.19)     | 0.11     |
| <b>Etanercept</b>  | 9,442                                                       | 137                                    | 7,657                                    | 74                              | 0.53 (0.40, 0.70)    | <0.01    | 0.76 (0.53, 1.08)     | 0.13     |
| <b>Infliximab</b>  | 10,509                                                      | 151                                    | 601                                      | 7                               | 0.92 (0.43, 1.96)    | 0.83     | 1.56 (0.49, 4.92)     | 0.45     |
| <b>Ustekinumab</b> | 10,332                                                      | 154                                    | 4,283                                    | 22                              | 0.38 (0.24, 0.60)    | <0.01    | 0.57 (0.34, 0.96)     | 0.03     |

---

<sup>a</sup> MTX, methotrexate

eTable 9. Overall risk of serious infection compared to methotrexate in patients with psoriasis by age and gender in Optum© Clinformatics® Data Mart

| Exposure    | PS-adjusted HR <sup>a</sup> (95% CI) |      | Gender<br>PS-adjusted HR (95% CI) |      |                   |      |
|-------------|--------------------------------------|------|-----------------------------------|------|-------------------|------|
|             | Overall                              | p    | Male                              | p    | Female            | p    |
| Acitretin   | 1.33 (0.78, 2.27)                    | 0.29 | 1.12 (0.57, 2.21)                 | 0.73 | 1.41 (0.64, 3.12) | 0.40 |
| Adalimumab  | 1.26 (0.86, 1.85)                    | 0.23 | 1.16 (0.70, 1.95)                 | 0.56 | 0.90 (0.52, 1.56) | 0.71 |
| Apremilast  | 0.39 (0.13, 1.20)                    | 0.10 | 0.52 (0.13, 2.03)                 | 0.35 | 0.36 (0.04, 3.31) | 0.37 |
| Etanercept  | 0.78 (0.54, 1.15)                    | 0.21 | 0.78 (0.47, 1.31)                 | 0.35 | 0.68 (0.38, 1.22) | 0.19 |
| Infliximab  | 2.01 (0.50, 8.02)                    | 0.32 | 4.21 (0.43, 40.99)                | 0.22 | 1.53 (0.25, 9.15) | 0.64 |
| Ustekinumab | 0.54 (0.32, 0.92)                    | 0.02 | 0.54 (0.25, 1.13)                 | 0.10 | 0.69 (0.31, 1.54) | 0.36 |

| Exposure    | Age Category<br>PS-adjusted HR (95% CI) |      |                   |      |                    |      |                   |      |
|-------------|-----------------------------------------|------|-------------------|------|--------------------|------|-------------------|------|
|             | 18-54                                   | p    | 55-64             | p    | 65-74              | p    | >=75              | p    |
| Acitretin   | 0.64 (0.27, 1.52)                       | 0.31 | 0.94 (0.37, 2.40) | 0.90 | 2.00 (0.64, 6.18)  | 0.23 | 0.60 (0.18, 2.06) | 0.42 |
| Adalimumab  | 1.34 (0.77, 2.35)                       | 0.30 | 1.29 (0.68, 2.45) | 0.43 | 1.80 (0.54, 5.98)  | 0.34 | 0.66 (0.12, 3.74) | 0.64 |
| Apremilast  | 0.32 (0.04, 2.90)                       | 0.31 | 0.63 (0.11, 3.47) | 0.59 | 0.51 (0.05, 5.60)  | 0.58 | * <sup>b</sup>    | *    |
| Etanercept  | 0.75 (0.43, 1.32)                       | 0.32 | 1.18 (0.58, 2.40) | 0.64 | 0.40 (0.12, 1.32)  | 0.13 | 1.66 (0.30, 9.11) | 0.56 |
| Infliximab  | 4.00 (0.45, 35.76)                      | 0.22 | *                 | *    | 3.57 (0.29, 43.94) | 0.32 | *                 | *    |
| Ustekinumab | 0.53 (0.25, 1.16)                       | 0.53 | 0.84 (0.31, 2.27) | 0.73 | 2.12 (0.39, 11.61) | 0.39 | *                 | *    |

<sup>a</sup> PS-adjusted HR, propensity score adjusted hazard ratio

<sup>b</sup> PS-adjusted HR could not be calculated due to low sample size

eTable 10. Censoring reasons for medication cohorts for Optum© Clinformatics® Data Mart and Truven MarketScan for systemic medications compared to adalimumab

|                                             | <b>Reference group:<br/>Adalimumab<br/>Users (compared<br/>to methotrexate)</b> | <b>Methotrexate<br/>users</b> | <b>Acitretin users</b> | <b>Apremilast<br/>users</b> | <b>Etanercept<br/>users</b> | <b>Infliximab<br/>Users</b> | <b>Ustekinumab<br/>Users</b> |
|---------------------------------------------|---------------------------------------------------------------------------------|-------------------------------|------------------------|-----------------------------|-----------------------------|-----------------------------|------------------------------|
| <b>United Optum CRD</b>                     |                                                                                 |                               |                        |                             |                             |                             |                              |
| No. of patients                             | 7,181                                                                           | 8,470                         | 2,835                  | 1,573                       | 7,698                       | 458                         | 3,254                        |
| Median Follow-Up Time (Days) [IQR]          | 257 [146, 463]                                                                  | 215 [146, 399]                | 181 [148, 295]         | 154 [84, 270]               | 258 [146, 500]              | 148 [57, 307]               | 227 [145, 414]               |
| <b>Censoring Reasons</b>                    |                                                                                 |                               |                        |                             |                             |                             |                              |
| Outcome                                     | 79 (1.1%)                                                                       | 112 (1.3%)                    | 29 (1.0%)              | 2 (0.1%)                    | 67 (0.9%)                   | 6 (1.3%)                    | 18 (0.6%)                    |
| Start of an additional exposure (crossover) | 366 (5.1%)                                                                      | 695 (8.2%)                    | 108 (3.8%)             | 65 (4.1%)                   | 871 (11.3%)                 | 17 (3.7%)                   | 76 (2.3%)                    |
| End of index exposure                       | 3,004 (41.8%)                                                                   | 4,300 (50.8%)                 | 1,757 (62.0%)          | 444 (28.2%)                 | 3,005 (39.0%)               | 164 (35.8%)                 | 1,083 (33.3%)                |
| Specified date reached (10/01/2015)         | 1,044 (14.5%)                                                                   | 918 (10.8%)                   | 136 (4.8%)             | 476 (30.3%)                 | 373 (4.8%)                  | 36 (7.9%)                   | 649 (19.9%)                  |
| Death/Disenrollment                         | 2688 (37.4%)                                                                    | 2445 (28.9%)                  | 612 (21.6%)            | 490 (31.2%)                 | 2638 (34.3%)                | 109 (23.8%)                 | 1234 (37.9%)                 |
| Methotrexate added                          | *                                                                               | *                             | 193 (6.8%)             | 96 (6.1%)                   | 744 (9.7%)                  | 126 (27.5%)                 | 194 (6.0%)                   |
| <b>Truven MarketScan</b>                    |                                                                                 |                               |                        |                             |                             |                             |                              |
| No. of patients                             | 17,912                                                                          | 20,609                        | 7,883                  | 4,344                       | 18,719                      | 1,332                       | 6,028                        |
| Median Follow-Up Time (Days) [IQR]          | 278 [153, 503]                                                                  | 209 [146, 391]                | 189 [148, 313]         | 148 [65, 233]               | 284 [146, 551]              | 158 [34, 358]               | 245 [145, 444]               |
| <b>Censoring Reasons</b>                    |                                                                                 |                               |                        |                             |                             |                             |                              |
| Outcome                                     | 197 (1.1%)                                                                      | 229 (1.1%)                    | 78 (1.0%)              | 8 (0.2%)                    | 176 (0.9%)                  | 22 (1.7%)                   | 41 (0.7%)                    |
| Start of an additional exposure (crossover) | 1,037 (5.8%)                                                                    | 2,249 (10.9%)                 | 339 (4.3%)             | 115 (2.6%)                  | 1,852 (9.9%)                | 92 (6.9%)                   | 179 (3.0%)                   |
| End of index exposure                       | 7,126 (39.8%)                                                                   | 10,156 (49.3%)                | 4,858 (61.6%)          | 719 (16.6%)                 | 7,396 (39.5%)               | 430 (32.3%)                 | 1,907 (31.6%)                |
| Specified date reached (10/01/2015)         | 2,789 (15.6%)                                                                   | 2,021 (9.8%)                  | 367 (4.7%)             | 1,503 (34.6%)               | 1,419 (7.6%)                | 61 (4.6%)                   | 1,325 (22.0%)                |
| Death/Disenrollment <sup>a</sup>            | 6763 (37.8%)                                                                    | 5954 (28.9%)                  | 1163 (21.1%)           | 1752 (40.3%)                | 5992 (32.0%)                | 85 (6.4%)                   | 2201 (36.5%)                 |
| Methotrexate added                          | *                                                                               | *                             | 578 (7.3%)             | 247 (5.7%)                  | 1,884 (10.1%)               | 642 (48.2%)                 | 375 (6.2%)                   |

eTable 11. Meta-analysis of pooled hazard risk of serious infection in patients with psoriasis on systemic medications compared to adalimumab

| Exposure                         | No. of Pooled Patients in Reference Group (adalimumab) | No. Pooled Events in Reference Group (adalimumab) <sup>a</sup> | No. of Pooled Patients in Exposure Group | Events in Exposure Group | Pooled Hazard Ratio <sup>b</sup> (95% CI <sup>c</sup> ) | Test for Overall Effect, P |
|----------------------------------|--------------------------------------------------------|----------------------------------------------------------------|------------------------------------------|--------------------------|---------------------------------------------------------|----------------------------|
| <b>Acitretin</b>                 |                                                        |                                                                |                                          |                          |                                                         |                            |
| <b>Overall Serious Infection</b> | <b>30,236</b>                                          | <b>288</b>                                                     | <b>10,718</b>                            | <b>107</b>               | <b>1.06 (0.79, 1.43)</b>                                | <b>0.71</b>                |
| Bacteremia/Sepsis                |                                                        | 65                                                             |                                          | 21                       | 0.85 (0.45, 1.61)                                       | 0.63                       |
| Cellulitis/soft-tissue infection |                                                        | 117                                                            |                                          | 45                       | 1.27 (0.80, 2.01)                                       | 0.31                       |
| Endocarditis                     |                                                        | 0                                                              |                                          | 0                        | *                                                       | *                          |
| Meningitis/Encephelitis          |                                                        | 3                                                              |                                          | 1                        | *                                                       | *                          |
| Pneumonia                        |                                                        | 100                                                            |                                          | 39                       | 0.98 (0.59, 1.65)                                       | 0.94                       |
| Pyelonephritis                   |                                                        | 7                                                              |                                          | 3                        | 2.82 (0.42, 18.77)                                      | 0.29                       |
| Septic arthritis/osteomyelitis   |                                                        | 8                                                              |                                          | 4                        | 0.60 (0.10, 3.64)                                       | 0.59                       |
| <b>Apremilast</b>                |                                                        |                                                                |                                          |                          |                                                         |                            |
| <b>Overall Serious Infection</b> | <b>31,385</b>                                          | <b>319</b>                                                     | <b>5,917</b>                             | <b>10</b>                | <b>0.31 (0.15, 0.65)</b>                                | <b>&lt;0.01</b>            |
| Bacteremia/Sepsis                |                                                        | 65                                                             |                                          | 2                        | 0.28 (0.05, 1.42)                                       | 0.14                       |
| Cellulitis/soft-tissue infection |                                                        | 137                                                            |                                          | 4                        | 0.27 (0.08, 0.86)                                       | 0.03                       |
| Endocarditis                     |                                                        | 0                                                              |                                          | 1                        | *                                                       | *                          |
| Meningitis/Encephelitis          |                                                        | 4                                                              |                                          | 0                        | *                                                       | *                          |
| Pneumonia                        |                                                        | 108                                                            |                                          | 5                        | 0.59 (0.19, 1.78)                                       | 0.36                       |
| Pyelonephritis                   |                                                        | 8                                                              |                                          | 0                        | *                                                       | *                          |
| Septic arthritis/osteomyelitis   |                                                        | 9                                                              |                                          | 0                        | *                                                       | *                          |
| <b>Etanercept</b>                |                                                        |                                                                |                                          |                          |                                                         |                            |
| <b>Overall Serious Infection</b> | <b>22,987</b>                                          | <b>202</b>                                                     | <b>26,417</b>                            | <b>243</b>               | <b>0.76 (0.61, 0.94)</b>                                | <b>0.01</b>                |
| Bacteremia/Sepsis                |                                                        | 47                                                             |                                          | 40                       | 0.52 (0.30, 0.87)                                       | 0.02                       |
| Cellulitis/soft-tissue infection |                                                        | 77                                                             |                                          | 103                      | 0.92 (0.66, 1.30)                                       | 0.64                       |
| Endocarditis                     |                                                        | 0                                                              |                                          | 0                        | *                                                       | *                          |
| Meningitis/Encephelitis          |                                                        | 4                                                              |                                          | 7                        | 1.15 (0.30, 4.38)                                       | 0.85                       |
| Pneumonia                        |                                                        | 68                                                             |                                          | 83                       | 0.62 (0.42, 0.91)                                       | 0.02                       |
| Pyelonephritis                   |                                                        | 7                                                              |                                          | 6                        | 0.62 (0.17, 2.23)                                       | 0.48                       |
| Septic arthritis/osteomyelitis   |                                                        | 7                                                              |                                          | 12                       | 1.20 (0.43, 3.39)                                       | 0.74                       |
| <b>Infliximab</b>                |                                                        |                                                                |                                          |                          |                                                         |                            |
| <b>Overall Serious Infection</b> | <b>31,427</b>                                          | <b>309</b>                                                     | <b>1,790</b>                             | <b>28</b>                | <b>1.92 (1.01, 3.62)</b>                                | <b>0.04</b>                |
| Bacteremia/Sepsis                |                                                        | 64                                                             |                                          | 5                        | 1.16 (0.26, 5.11)                                       | 0.86                       |
| Cellulitis/soft-tissue infection |                                                        | 132                                                            |                                          | 13                       | 1.46 (0.61, 3.49)                                       | 0.40                       |

|                                  |               |            |               |            |                          |             |
|----------------------------------|---------------|------------|---------------|------------|--------------------------|-------------|
| Endocarditis                     |               | 0          |               | 0          | *                        | *           |
| Meningitis/Encephelitis          |               | 4          |               | 1          | *                        | *           |
| Pneumonia                        |               | 105        |               | 9          | 2.18 (0.60, 7.97)        | 0.24        |
| Pyelonephritis                   |               | 7          |               | 1          | *                        | *           |
| Septic arthritis/osteomyelitis   |               | 9          |               | 0          | *                        | *           |
| <b>Methotrexate</b>              |               |            |               |            |                          |             |
| <b>Overall Serious Infection</b> | <b>25,093</b> | <b>276</b> | <b>29,079</b> | <b>341</b> | <b>0.93 (0.75, 1.14)</b> | <b>0.51</b> |
| Bacteremia/Sepsis                |               | 55         |               | 78         | 0.93 (0.58, 1.48)        | 0.77        |
| Cellulitis/soft-tissue infection |               | 117        |               | 97         | 0.74 (0.53, 1.05)        | 0.08        |
| Endocarditis                     |               | 0          |               | 0          | *                        | *           |
| Meningitis/Encephelitis          |               | 2          |               | 6          | 1.28 (0.16, 10.28)       | 0.83        |
| Pneumonia                        |               | 98         |               | 151        | 1.09 (0.78, 1.52)        | 0.63        |
| Pyelonephritis                   |               | 8          |               | 9          | 0.90 (0.22, 3.66)        | 0.89        |
| Septic arthritis/osteomyelitis   |               | 8          |               | 13         | 1.37 (0.46, 4.07)        | 0.58        |
| <b>Ustekinumab</b>               |               |            |               |            |                          |             |
| <b>Overall Serious Infection</b> | <b>30,942</b> | <b>306</b> | <b>9,282</b>  | <b>59</b>  | <b>0.70 (0.49, 1.00)</b> | <b>0.05</b> |
| Bacteremia/Sepsis                |               | 62         |               | 12         | 0.77 (0.32, 1.86)        | 0.57        |
| Cellulitis/soft-tissue infection |               | 133        |               | 26         | 0.69 (0.40, 1.19)        | 0.18        |
| Endocarditis                     |               | 0          |               | 0          | *                        | *           |
| Meningitis/Encephelitis          |               | 4          |               | 1          | *                        | *           |
| Pneumonia                        |               | 105        |               | 18         | 0.64 (0.34, 1.20)        | 0.17        |
| Pyelonephritis                   |               | 7          |               | 2          | 1.08 (0.14, 8.56)        | 0.95        |
| Septic arthritis/osteomyelitis   |               | 7          |               | 1          | *                        | *           |

<sup>a</sup> The sum of events in the sub analyses of serious infections may be greater than the number of events in the overall serious infection analysis if a patient experienced greater than one serious infectious event.

<sup>b</sup> Adjusted for 20% overlap of patients between United Optum CDM and Truven MarketScan

<sup>c</sup> CI, confidence interval

\* Pooled HRs not calculated when HR not calculated in either Optum or MarketScan due to zero events in exposure or reference groups.
